# Supplementary material for: Dnt1 acts as a mitotic inhibitor of the spindle checkpoint protein dma1 in fission yeast
Source: PubMed Central journal article supplement — Mol Biol Cell. 2012 Sep 1;23(17):3348–56. doi: 10.1091/mbc.E11-12-1020 (PMC3431938; doi:10.1091/mbc.e11-12-1020), 2012-09-01
Supplement: supp_E11-12-1020_CombinedSupMats.pdf [file supp_E11-12-1020_CombinedSupMats.pdf]

Supplementary figure legends:

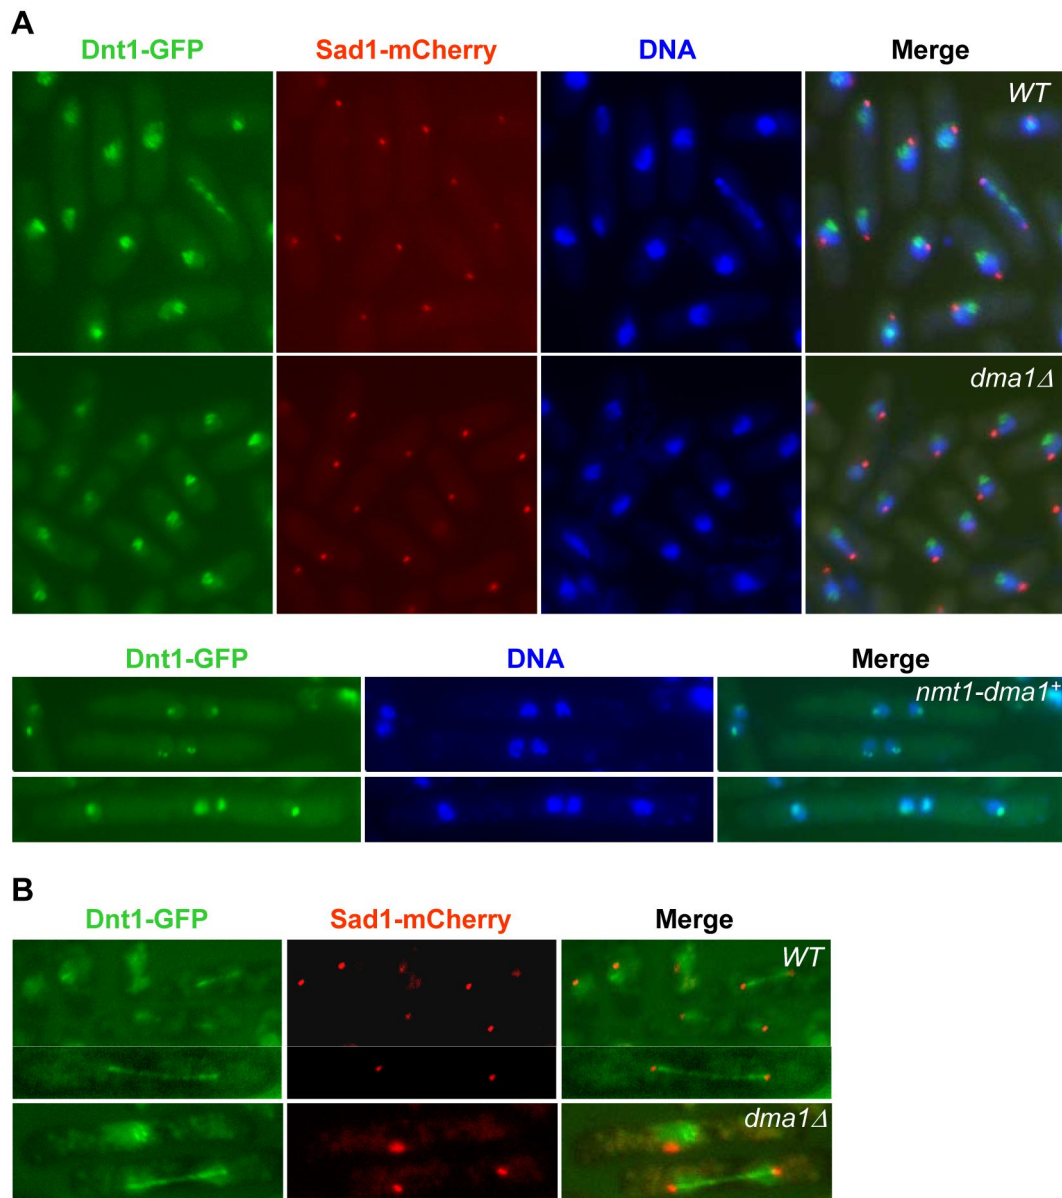

**Supplementary figure S1. Absence or overexpression of Dma1 does not impair localization of Dnt1 in the nucleolus or on anaphase spindle.**

(A) Wild type and *dma1Δ* cells carrying Dnt1-GFP and Sad1-mCherry were grown in liquid YE at 30°C, then collected, fixed with methanol at room temperature, and DAPI stained. For *nmt1-dma1*<sup>+</sup> cells carrying Dnt1-GFP, overexpression of Dma1 was induced in EMM liquid media without thiamine for 20hr at 30°C. Cells were fixed and stained with DAPI. (B) Examples of anaphase cells with spindles.

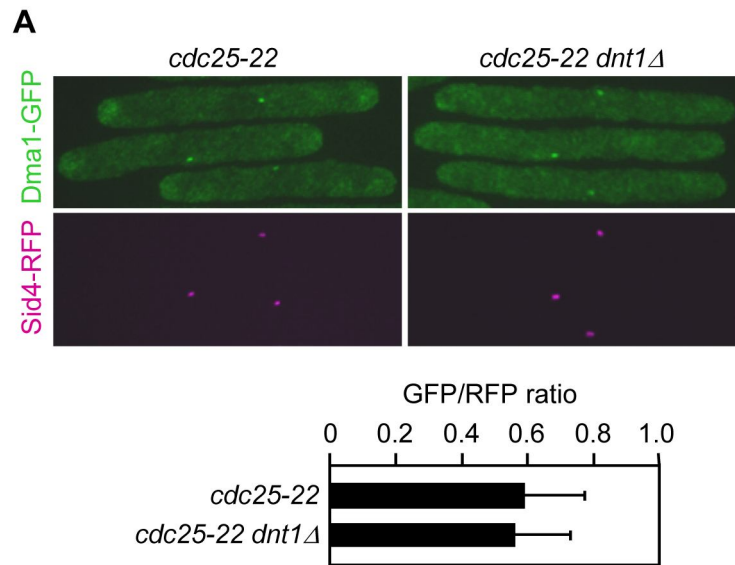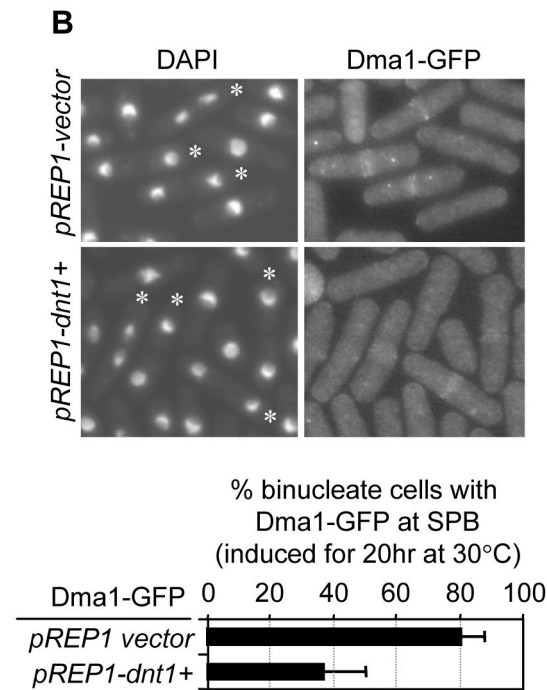

**Supplementary figure S2. Localization of Dma1-GFP at SPB during G2 is not affected by *dnt1Δ*, and overexpression of *dnt1*<sup>+</sup> can drive Dma1-GFP off SPBs in binucleate cells.**

(A) During G2, Dma1-GFP intensity at SPBs is not affected by the absence of *dnt1*<sup>+</sup>. *cdc25-22* cells were arrested at G2 by incubation at 36°C for 4hr, and then Dma1-GFP and Sid4-RFP intensities were quantitated in *dnt1*<sup>+</sup> and *dnt1Δ* cells. Final values are

expressed as GFP/RFP ratios. Error bars represent the SEM. 20 cells were measured for each strain and averaged for statistical analysis,  $p > 0.05$ .

(B) Wild type cells carrying Dma1-GFP were transformed with expression plasmids pREP1 (vector) or pREP1-*dnt1*<sup>+</sup> and induced for overexpression of *dnt1*<sup>+</sup> in EMM liquid media without thiamine for 20hr at 30°C. Cells were collected, fixed and DAPI stained. (Upper) Representative cells are shown. Asterisks indicate binucleate cells.

(Lower) Binucleate cells with Dma1-GFP signals at SPBs were scored ( $n > 150$ ). Error bars represent the SD from 3 independent experiments.

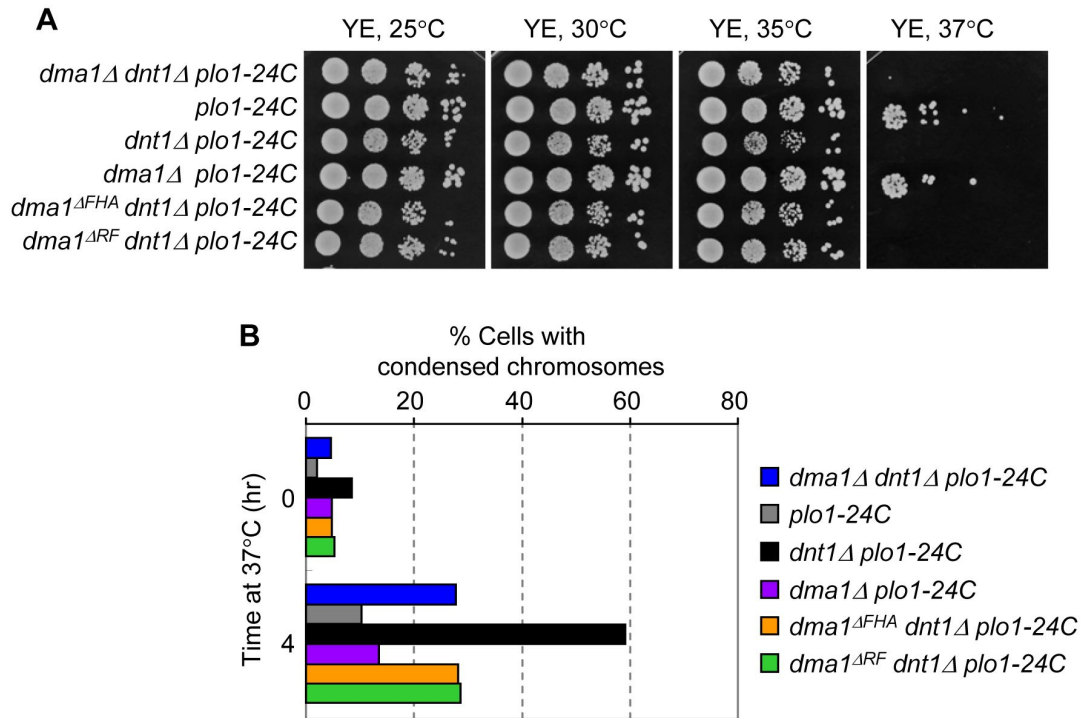

**Supplementary figure S3. Negative genetic interaction between *plo1-24C* and *dnt1Δ* can be rescued by disruption of FHA or RF domains in *Dma1*.**

(A) Serial dilutions (10 fold) of the indicated single, double or triple mutant strains were spotted on YE and incubated at the indicated temperatures. (B) Liquid cultures of the indicated strains were grown at 25°C then shifted to 37°C, and the percentages of cells with condensed chromosomes/metaphase arrest were quantified after being fixed and stained with DAPI (n=200).

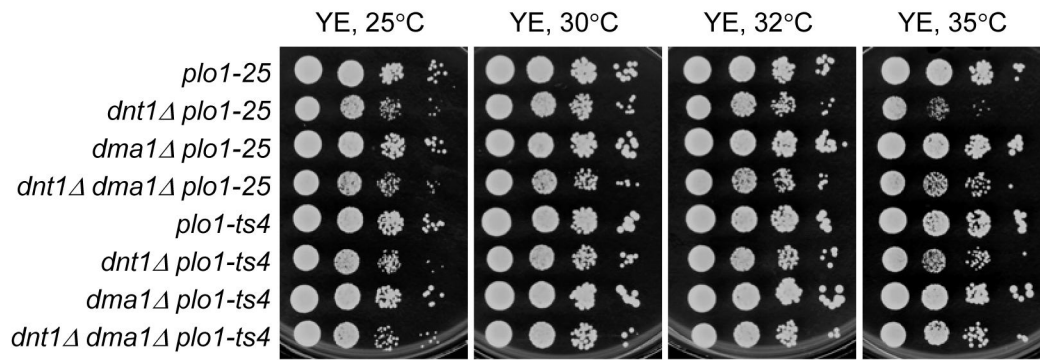

**Supplementary figure S4. The sensitivity of other alleles of *plo1* mutants to deletion of *dnt1*<sup>+</sup> can also be alleviated by disruption of *Dma1* function.**

(A and B) Serial dilutions (10 fold) of the indicated single, double or triple mutant strains were spotted on YE and incubated at the indicated temperatures. All *plo1* mutant alleles show synthetic interactions with *dnt1Δ*.

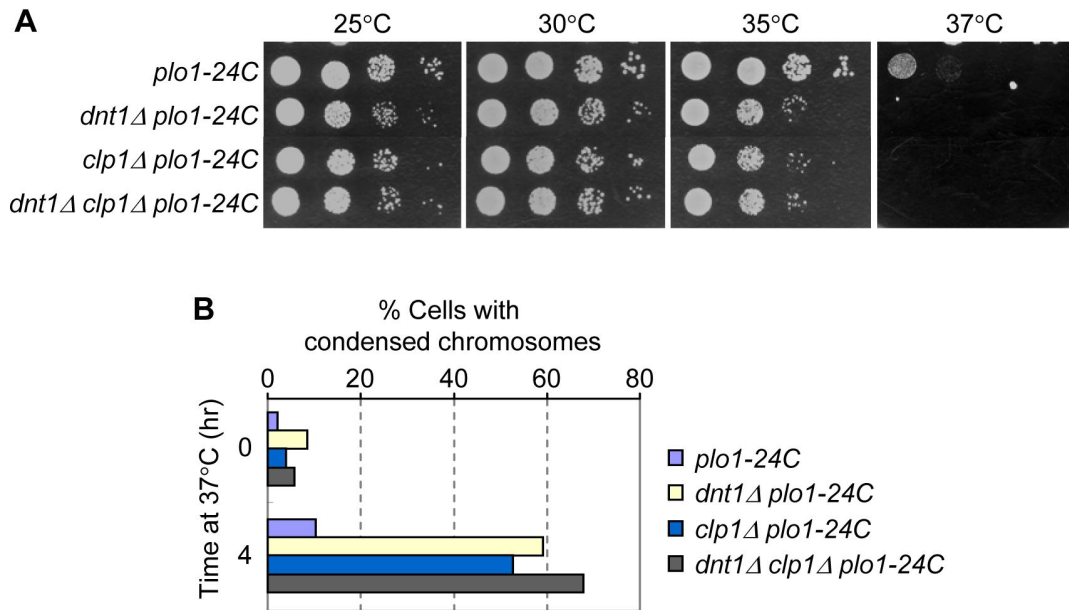

**Supplementary figure S5. Negative genetic interaction between *plo1-24C* and *dnt1Δ* is independent of Clp1.**

(A) Growth of serial dilutions (10 fold) of the indicated strains were grown on YE at the indicated temperatures. (B) Quantification of condensed chromosomes/metaphase arrest in liquid cultures at 37°C were performed as in supplementary figure S3B.

Supplementary tables:

Table S1. Yeast strains used in this study.

| Strain  | Genotype                                                                                                                 |
|---------|--------------------------------------------------------------------------------------------------------------------------|
| YDM105  | <i>h<sup>-</sup> leu1-32 ura4-D18 ade6-210</i>                                                                           |
| YDM106  | <i>h<sup>+</sup> leu1-32 ura4-D18 ade6-210</i>                                                                           |
| YDM1758 | <i>h<sup>-</sup> dma1-3HA-TAP::kanR leu1-32 ura4-D18 ade6-210</i>                                                        |
| YDM1863 | <i>h<sup>+</sup> dma1-3HA-TAP::kanR mts3-1 leu1-32 ura4-D18</i>                                                          |
| YDM2460 | <i>h<sup>+</sup> dnt1-3HA-TAP::kanR leu1-32 ura4-D18 ade6-210</i>                                                        |
| YDM2258 | <i>h<sup>-</sup> dma1-3HA-TAP::kanR nda3-KM311 leu1-32 ura4-D18 ade6-21x</i>                                             |
| YDM3262 | <i>h<sup>?</sup> dma1-3HA-TAP::kanR nda3-KM311 dnt1Δ::ura4<sup>+</sup> leu1-32 ura4-D18</i>                              |
| YDM3263 | <i>h<sup>?</sup> dma1-3HA-TAP::kanR mts3-1 dnt1Δ::ura4<sup>+</sup> leu1-32 ura4-D18</i>                                  |
| YDM919  | <i>h<sup>-</sup> dma1-GFP::kanR leu1-32 ura4-D18 ade6-21x</i>                                                            |
| YDM2420 | <i>h<sup>-</sup> dnt1-13myc::kanR leu1-32 ade6-210 ura4-D18</i>                                                          |
| YDM2421 | <i>h<sup>-</sup> dma1-GFP::kanR dnt1-13myc::kanR leu1-32 ade6-21x ura4-D18</i>                                           |
| YDM2558 | <i>h<sup>?</sup> cdc10-129 dma1-GFP::kanR dnt1-13myc::kanR</i>                                                           |
| YDM2562 | <i>h<sup>?</sup> mts3-1 dma1-GFP::kanR dnt1-13myc::kanR</i>                                                              |
| YDM2557 | <i>h<sup>?</sup> nda3-KM311 dma1-GFP::kanR dnt1-13myc::kanR</i>                                                          |
| YDM3274 | <i>h<sup>?</sup> mts3-1 dma1Δ::kanR dnt1-13myc-kanR leu1-32 ura4-D18</i>                                                 |
| JY2703  | <i>h<sup>+</sup> nda3-KM311 dnt1-GFP::kanR sad1-mCherry::natMx6 leu1-32 ura4-D18</i>                                     |
| JY2734  | <i>h<sup>-</sup> mts3-1 dnt1-GFP::kanR sad1-mCherry::natMx6 ura4-D18</i>                                                 |
| YDM3041 | <i>h<sup>-</sup> leu1-32::nmt1-dma1::leu1<sup>+</sup> dnt1Δ::ura4<sup>+</sup> ura4-D18 ade6-216</i>                      |
| JY384   | <i>h<sup>+</sup> leu1-32::nmt1-dma1::leu1<sup>+</sup> dnt1Δ::ura4<sup>+</sup> cut2-GFP::LEU2</i>                         |
| JY392   | <i>h<sup>+</sup> leu1-32::nmt1-dma1::leu1<sup>+</sup> dnt1Δ::kanR cdc13-GFP::LEU2 ura4-D18</i>                           |
| YDM1035 | <i>h<sup>-</sup> leu1-32::nmt1-dma1::leu1<sup>+</sup> ade6-216 ura4-D18</i>                                              |
| YDM3124 | <i>h<sup>-</sup> leu1-32::nmt1-dma1::leu1<sup>+</sup> dnt1Δ::ura4<sup>+</sup> mad2Δ::ura4<sup>+</sup> ura4-D18</i>       |
| JY368   | <i>h<sup>?</sup> leu1-32::nmt1-dma1::leu1<sup>+</sup> dnt1Δ::kanR bub1Δ::ura4<sup>+</sup></i>                            |
| JY699   | <i>h<sup>+</sup> leu1-32::nmt1-dma1<sup>ARF</sup>::leu1<sup>+</sup> ura4-D18 ade6-210</i>                                |
| JY700   | <i>h<sup>+</sup> leu1-32::nmt1-dma1<sup>C210;H212A</sup>::leu1<sup>+</sup> ura4-D18 ade6-210</i>                         |
| JY744   | <i>h<sup>-</sup> leu1-32::nmt1-dma1<sup>ARF</sup>::leu1<sup>+</sup> dnt1Δ::ura4<sup>+</sup> ura4-D18 ade6-210</i>        |
| JY747   | <i>h<sup>+</sup> leu1-32::nmt1-dma1<sup>C210;H212A</sup>::leu1<sup>+</sup> dnt1Δ::ura4<sup>+</sup> ura4-D18 ade6-210</i> |
| JY2032  | <i>h<sup>+</sup> leu1-32::nmt1-dma1<sup>AFHA</sup>::leu1<sup>+</sup> dnt1Δ::kanR ura4-D18 ade6-210</i>                   |
| JY2034  | <i>h<sup>+</sup> leu1-32::nmt1-dma1<sup>R64A</sup>::leu1<sup>+</sup> dnt1Δ::kanR ura4-D18 ade6-210</i>                   |
| JY2036  | <i>h<sup>+</sup> leu1-32::nmt1-dma1<sup>H88A</sup>::leu1<sup>+</sup> dnt1Δ::kanR ura4-D18 ade6-210</i>                   |
| YDM1159 | <i>h<sup>-</sup> dma1Δ::ura4 ura4-D18 leu1-32 ade6-21x</i>                                                               |
| YDM2379 | <i>h<sup>-</sup> dnt1Δ::ura4<sup>+</sup> leu1-32 ura4-D18 ade6-210</i>                                                   |
| YDM2812 | <i>h<sup>+</sup> dnt1Δ::kanR leu1-32 ura4-D18 ade6-210</i>                                                               |
| YDM2440 | <i>h<sup>+</sup> dnt1Δ::ura4<sup>+</sup> dma1Δ::ura4<sup>+</sup> leu1-32 ura4-D18 ade6-216</i>                           |
| YDM1010 | <i>h<sup>-</sup> alp4-1891 leu1-32</i>                                                                                   |
| JY576   | <i>h<sup>-</sup> dnt1Δ::kanR alp4-1891 leu1-32 ura4</i>                                                                  |
| JY621   | <i>h<sup>?</sup> dma1Δ::ura4<sup>+</sup> dnt1Δ::kanR alp4-1891 leu1-32 ura4</i>                                          |
| YDM1009 | <i>h<sup>-</sup> alp6-719 leu1-32</i>                                                                                    |
| JY575   | <i>h<sup>-</sup> dnt1Δ::kanR alp6-719 leu1-32 ura4</i>                                                                   |
| JY620   | <i>h<sup>?</sup> dma1Δ::ura4<sup>+</sup> dnt1Δ::kanR alp6-719 leu1-32 ura4</i>                                           |
| JY423   | <i>h<sup>-</sup> sad1-1 leu1</i>                                                                                         |
| JY504   | <i>h<sup>-</sup> dnt1Δ::ura4<sup>+</sup> sad1-1 leu1</i>                                                                 |
| JY727   | <i>h<sup>?</sup> dma1Δ::kanR sad1-1 leu1-32 ura4-D18</i>                                                                 |
| JY698   | <i>h<sup>?</sup> dma1Δ::kanR dnt1Δ::ura4<sup>+</sup> sad1-1 leu1-32 ura4-D18</i>                                         |
| YDM113  | <i>h<sup>+</sup> plo1-24C leu1-32 ura4-D18 ade6-21x</i>                                                                  |
| YDM3266 | <i>h<sup>+</sup> dnt1Δ::kanR plo1-24C leu1-32 ura4-D18 ade6-21x</i>                                                      |

|          |                                                                                                                             |
|----------|-----------------------------------------------------------------------------------------------------------------------------|
| YDM3289  | <i>h<sup>2</sup> dma1Δ::ura4<sup>+</sup> dnt1Δ::kanR plo1-24C</i>                                                           |
| JY2632   | <i>h<sup>+</sup> dma1<sup>ΔFHA</sup> ura4-D18 leu1-32 ade6-216</i>                                                          |
| JY2774   | <i>h<sup>-</sup> dma1<sup>ΔFHA</sup> dnt1Δ::kanR plo1-24C leu1-32 ura4-D18 ade6-21x</i>                                     |
| JY2633   | <i>h<sup>+</sup> dma1<sup>ΔRF</sup> ura4-D18 leu1-32 ade6-216</i>                                                           |
| JY2775   | <i>h<sup>+</sup> dma1<sup>ΔRF</sup> dnt1Δ::kanR plo1-24C leu1-32 ura4-D18 ade6-21x</i>                                      |
| YDM3292  | <i>h<sup>2</sup> mad2Δ::ura4<sup>+</sup> plo1-24C</i>                                                                       |
| YDM3333  | <i>h<sup>2</sup> dnt1Δ::kanR mad2Δ::ura4<sup>+</sup> plo1-24C leu1-32 ura4-D18</i>                                          |
| YDM412   | <i>h<sup>-</sup> plo1-25 leu1-32</i>                                                                                        |
| YDM1411  | <i>h<sup>+</sup> plo1-25 leu1-32 ade6-21x</i>                                                                               |
| YDM3267  | <i>h<sup>-</sup> dnt1Δ::kanR plo1-25 leu1-32</i>                                                                            |
| YDM3290  | <i>h<sup>2</sup> dma1Δ::ura4<sup>+</sup> dnt1Δ::kanR plo1-25</i>                                                            |
| YDM3303  | <i>h<sup>2</sup> dnt1Δ::ura4<sup>+</sup> plo1-25 mad2Δ::ura4<sup>+</sup> leu1-32 ura4-D18</i>                               |
| YDM1532  | <i>h<sup>+</sup> plo1-ts4::ura4<sup>+</sup> ura4-D18 ade6-21x leu1-32</i>                                                   |
| YDM3268  | <i>h<sup>2</sup> dnt1Δ::kanR plo1-ts4::ura4<sup>+</sup> ura4-D18 ade6-21x leu1-32</i>                                       |
| YDM3291  | <i>h<sup>2</sup> dma1Δ::ura4<sup>+</sup> dnt1Δ::kanR plo1-ts4::ura4<sup>+</sup></i>                                         |
| YDM2825  | <i>h<sup>-</sup> plo1-24C GFP-atb2<sup>+</sup>::kanR sad1-mCherry::natMX6 leu1 ura4</i>                                     |
| YDM2886  | <i>h<sup>-</sup> dnt1Δ::kanR plo1-24C GFP-atb2<sup>+</sup>::kanR sad1-mCherry::natMX6 leu1 ura4</i>                         |
| YDM2785  | <i>h<sup>-</sup> dma1Δ::ura4<sup>+</sup> dnt1Δ::kanR plo1-24C GFP-atb2<sup>+</sup>::kanR sad1-mCherry::natMX6 leu1 ura4</i> |
| YDM919   | <i>h<sup>-</sup> dma1-GFP::kanR leu1-32 ura4-D18 ade6-21x</i>                                                               |
| YDM3399  | <i>h<sup>2</sup> dnt1Δ::ura4<sup>+</sup> dma1-GFP::kanR ura4-D18 ade6-21x leu1-32</i>                                       |
| YDM918   | <i>h<sup>-</sup> dma1-13myc::kan leu1-32 ura4-D18 ade6-21x</i>                                                              |
| YDM 3406 | <i>h<sup>2</sup> dnt1Δ::kanR dma1-13myc::kanR ura4-D18 leu1-32</i>                                                          |
| JY2659   | <i>h<sup>+</sup> dnt1-GFP::kanR sad1-mCherry::natMX6 leu1-32 ura4-D18 ade6-210</i>                                          |
| JY2636   | <i>h<sup>2</sup> dma1Δ::ura4<sup>+</sup> dnt1-GFP::kanR sad1-mCherry::natMX6 leu1-32 ura4-D18 ade6-21x</i>                  |
| JY2639   | <i>h<sup>2</sup> leu1-32::nmt1-dma1::leu1<sup>+</sup> dnt1-GFP::kanR ura4-D18 ade6-21x</i>                                  |
| KGY8415  | <i>h<sup>-</sup> sid4-HBH::kanR ade6-M210 leu1-32 ura4-D18</i>                                                              |
| KGY10621 | <i>h<sup>-</sup> dnt1Δ::ura4<sup>+</sup> sid4-HBH::kanR ade6-M21x leu1-32 ura4-D18</i>                                      |
| KGY11605 | <i>h<sup>-</sup> dma1-GFP::kanR sid4-RFP::kanR ade6-M210 leu1-32 ura4-D18</i>                                               |
| KGY11874 | <i>h<sup>+</sup> dnt1Δ::ura4<sup>+</sup> dma1-GFP::kanR sid4-RFP::kanR ade6-M21x leu1-32 ura4-D18</i>                       |
| KGY11657 | <i>h<sup>-</sup> cdc25-22 dma1-GFP;KanR sid4-RFP;KanR ade6-M210 leu1-32 ura4-D18</i>                                        |
| KGY13809 | <i>h<sup>+</sup> cdc25-22 dma1-GFP;kanR sid4-RFP;kanR dnt1::ura4<sup>+</sup> ade6-M21x leu1-32 ura4-d18</i>                 |



**Table S2.** List of proteins identified by mass spectrometry co-purifying with Dma1-3HA-TAP from mts3-1 arrested cells [Yeast strain used: YDM1972 *h- mts3-1 dma1-3HA-TAP::kanR sid4-GFP::kanR ura4-D18 leu1-32 ade6-21X*]. [1<sup>st</sup> purification]

| Protein Name/Locus                           | # Unique peptides | Sequence Coverage | Descriptive Name                                                                                                                                 |
|----------------------------------------------|-------------------|-------------------|--------------------------------------------------------------------------------------------------------------------------------------------------|
| DMA1, SPAC17G8.10C                           | 58                | 85.0%             | : SPINDLE ASSEMBLY CHECKPOINT COMPONENT; PROTEIN TO PREVENT SEPTUM FORMATION AND PREMATURE EXIT FROM MITOSIS IF SPINDLE FUNCTION IS COMPROMISED: |
| DNT1, SPBC25D12.02C                          | 47                | 57.4%             | : HYPOTHETICAL PROTEIN; SEQUENCE ORPHAN; SERINE- RICH:                                                                                           |
| HSP70, SPCC1739.13                           | 28                | 43.4%             | : HEAT SHOCK PROTEIN 70 FAMILY:                                                                                                                  |
| GPD1, SPBC32F12.11, TDH1                     | 13                | 38.4%             | : GLYCERALDEHYDE 3-PHOSPHATE DEHYDROGENASE:                                                                                                      |
| UBI1, SPAC11G7.04                            | 3                 | 34.4%             | : UBIQUITIN FAMILY PROTEIN:                                                                                                                      |
| UEP1, SPAC1805.12C, UBI2                     | 3                 | 34.4%             | : UBIQUITIN FUSION PROTEIN:                                                                                                                      |
| ADH1, SPCC13B11.01, ADH                      | 9                 | 30.9%             | : ALCOHOL DEHYDROGENASE I; REDUCING ACETALDEHYDE TO ETHANOL, REGENERATING NAD <sup>+</sup> :                                                     |
| SKS2, SPBC1709.05, HSC1                      | 10                | 28.5%             | : HEAT SHOCK PROTEIN 70 FAMILY:                                                                                                                  |
| SPBC27B12.12C                                | 14                | 25.8%             | : MIT FAMILY METAL ION TRANSPORTER; PUTATIVE INORGANIC CATION TRANSPORTER; SIMILAR TO S. CEREVISIAE ALR1:                                        |
| EF1-B, SPBC839.15C                           | 14                | 25.7%             | : ELONGATION FACTOR 1 ALPHA-B:                                                                                                                   |
| TEF1-E, SPCC794.09C, EF1A-E                  | 14                | 25.7%             | : ELONGATION FACTOR 1-ALPHA-E:                                                                                                                   |
| EF1A-B, SPAC23A1.10, TEF1-B, TEF1-D, EF1A-B, | 14                | 25.7%             | : ELONGATION FACTOR 1 ALPHA-B/D:                                                                                                                 |
| ACT1, SPBC32H8.12C, CPS8, PI012              | 6                 | 25.6%             | : ACTIN:                                                                                                                                         |
| ANC1, SPBC530.10C                            | 6                 | 23.3%             | : ADENINE NUCLEOTIDE CARRIER; MITOCHONDRIAL CARRIER (MCF) FAMILY:                                                                                |
| SPAC589.10C                                  | 2                 | 22.7%             | : UBIQUITIN-LIKE PROTEIN; IDENTICAL TO SPAC6G10.11C.:                                                                                            |
| UBI4, SPBC337.08C                            | 2                 | 8.9%              | : UBIQUITIN FAMILY PROTEIN:                                                                                                                      |
| UBI3, SPAC6G10.11C                           | 2                 | 22.7%             | : UBIQUITIN FUSION PROTEIN:                                                                                                                      |
| SMD3, SPBC19C2.14                            | 2                 | 21.6%             | : SMALL NUCLEAR RIBONUCLEOPROTEIN; PUTATIVE PRE- MRNA SPLICING FACTOR; SIMILAR TO S. CEREVISIAE SMD3:                                            |
| BIP, SPAC22A12.15C                           | 9                 | 20.2%             | : 78 KD GLUCOSE REGULATED PROTEIN HOMOLOG; HSP70 FAMILY:                                                                                         |
| SPBC15D4.08C                                 | 2                 | 19.6%             | : VERY HYPOTHETICAL PROTEIN:                                                                                                                     |
| FBA1, SPBC19C2.07                            | 4                 | 19.3%             | : FRUCTOSE-BISPHOSPHATE ALDOLASE; SIMILAR TO S. CEREVISIAE FBA1:                                                                                 |
| SPAC13G7.02C                                 | 12                | 18.6%             | : HEAT SHOCK PROTEIN 70 FAMILY:                                                                                                                  |
| RFC4, SPAC1687.03C                           | 2                 | 18.4%             | : REPLICATION FACTOR C (ACTIVATOR 1) SUBUNIT; ACTIVATOR OF DNA POLYMERASES:                                                                      |
| SPAC2G11.15C, SPAC521.01C                    | 2                 | 17.2%             | : PUTATIVE METHYLTRANSFERASE:                                                                                                                    |
| SPBC1703.13C                                 | 2                 | 16.4%             | : MC PHOSPHATE TRANSPORTER:                                                                                                                      |
| SPBC13E7.01, SPBC15D4.16                     | 10                | 15.5%             | : CONSERVED PROTEIN; SIMILAR TO S. CEREVISIAE YGR278W CONSERVED PROTEIN; SIMILAR TO S. CEREVISIAE YGR278W:                                       |
| SPAC24H6.09                                  | 6                 | 14.6%             | : PUTATIVE GUANINE NUCLEOTIDE EXCHANGE FACTOR; COILED-COIL REGIONS; PREDICTED COILED-COIL REGION:                                                |
| GPD3, SPBC354.12                             | 7                 | 14.3%             | : GLYCERALDEHYDE 3-PHOSPHATE DEHYDROGENASE:                                                                                                      |
| HOB3, SPBC725.09C                            | 2                 | 14.0%             | : INVOLVED IN CELL CYCLE REGULATION; CYTOKINESIS AND CYTOSKELETAL ORGANIZATION:                                                                  |
| DBP2, SPBP8B7.16C                            | 5                 | 13.6%             | : DEAD/DEAH BOX HELICASE; PUTATIVE                                                                                                               |

|                                     |    |       |                                                                                                                                                                                                                                                                |
|-------------------------------------|----|-------|----------------------------------------------------------------------------------------------------------------------------------------------------------------------------------------------------------------------------------------------------------------|
|                                     |    |       | PRE-MRNA SPLICING FACTOR; HUMAN P68-LIKE PROTEIN; SIMILAR TO S. CEREVISIAE DPB2; CONTAINS LARGE 3' INTRON LIKE S. CEREVISIAE DBP2:                                                                                                                             |
| SPAC821.03C                         | 3  | 13.0% | : HYPOTHETICAL SERINE-RICH PROTEIN; SEQUENCE ORPHAN:                                                                                                                                                                                                           |
| SPBC660.06                          | 2  | 12.8% | : HYPOTHETICAL GLYCINE RICH PROTEIN; POMBE SPECIFIC DOMAIN PFAM-B_15930:                                                                                                                                                                                       |
| SPAC19G12.05                        | 2  | 12.7% | : MC TRICARBOXYLATE TRANSPORTER:                                                                                                                                                                                                                               |
| SPCC970.03                          | 3  | 12.3% | : PUTATIVE NADH-CYTOCHROME B5 REDUCTASE; SIMILAR TO S. CEREVISIAE CBR1:                                                                                                                                                                                        |
| SPCC1393.08                         | 2  | 11.5% | : TRANSCRIPTION FACTOR GATA-TYPE:                                                                                                                                                                                                                              |
| SUM3, SPCC1795.11, DED1, SLH3, MOC2 | 7  | 11.3% | : DEAD/DEAH BOX HELICASE; ATP-DEPENDENT RNA HELICASE; POSITIVELY INVOLVED IN THE INITIATION OF PROTEIN SYNTHESIS; ESSENTIAL; SUPPRESSOR OF UNCONTROLLED MITOSIS; SUBCELLULAR LOCALIZATION OF GFP FUSION-CYTOPLASM; INTERACTS WITH CHK1; INTERACTS WITH CDC2: O |
| SPCC1672.05C                        | 2  | 11.2% | : TYROSYL-TRNA SYNTHETASE CYTOPLASMIC:                                                                                                                                                                                                                         |
| SPAP27G11.02                        | 2  | 11.2% | : HYPOTHETICAL PROTEIN; SIMILAR TO S. CEREVISIAE YKL133C (LOW):                                                                                                                                                                                                |
| CSX1, SPAC17A2.09C                  | 3  | 11.1% | : RNA-BINDING PROTEIN; POST-TRANSCRIPTIONAL REGULATOR:                                                                                                                                                                                                         |
| GIT7, SPBC36.12C, SPBC713.01C       | 2  | 11.1% | : GLUCOSE INSENSITIVE TRANSCRIPTION:                                                                                                                                                                                                                           |
| PYK1, SPAC4H3.10C                   | 5  | 11.0% | : PYRUVATE KINASE (EC 2.7.1.40):                                                                                                                                                                                                                               |
| SPCC24B10.10C                       | 2  | 10.7% | : PUTATIVE INTRA-MITOCHONDRIAL SORTING PROTEIN, AAA FAMILY OF ATPASE; SIMILAR TO S. CEREVISIAE MPS1:                                                                                                                                                           |
| CWF4, SPBC31F10.11C, SYF3           | 4  | 9.8%  | : PUTATIVE PRE-MRNA SPLICING FACTOR; 40S SNRNP- CONTAINING COMPLEX; SIMILAR TO S. CEREVISIAE CLF1:                                                                                                                                                             |
| SPBC646.10C                         | 4  | 9.7%  | : PUTATIVE U3 SNORNP COMPONENT; PUTATIVE COMPONENT OF BOX C/D SNORNPS; INVOLVED IN 2'-O-METHYLATION OF RIBOSOMAL RNAS; SIMILAR TO S. CEREVISIAE SIK1:                                                                                                          |
| SPAC323.04                          | 2  | 9.7%  | : PUTATIVE ABC METAL TRANSPORT ATP-BINDING PROTEIN:                                                                                                                                                                                                            |
| LSD1, SPAC4A8.11C, FAS2             | 11 | 9.5%  | : FATTY ACID SYNTHASE, SUBUNIT ALPHA:                                                                                                                                                                                                                          |
| SPAC12G12.06C                       | 2  | 9.4%  | : PUTATIVE RNA 3'-TERMINAL PHOSPHATE CYCLASE:                                                                                                                                                                                                                  |
| ALG11, SPCC330.08, GMD3             | 2  | 9.3%  | : GLYCOSYL TRANSFERASE; INVOLVED IN N-LINKED OLIGOSACCHADRIDE SYNTHESIS:                                                                                                                                                                                       |
| SSP1, SPAC664.11                    | 5  | 9.2%  | : MITOCHONDRIAL CHAPERONIN; HEAT SHOCK 70 KD PROTEIN; INVOLVED IN MITOCHONDRIAL PROTEIN IMPORT:                                                                                                                                                                |
| SPO4, SPBC21C3.18                   | 2  | 9.1%  | : PROTEIN KINASE; INVOLVED IN MEIOTIC SPINDLE FORMATION:                                                                                                                                                                                                       |
| ADE2, SPAC144.03, MIN10, MIN3       | 2  | 9.0%  | : ADENYLOSUCCINATE SYNTHETASE:                                                                                                                                                                                                                                 |
| SPBC19G7.10C                        | 4  | 8.9%  | : TOPOISOMERASE ASSOCIATED YEAST PAT1 HOMOLOG:                                                                                                                                                                                                                 |
| FIB, SPBC2D10.10C                   | 3  | 8.9%  | : FIBRILLARIN; PUTATIVE U3 SNORNP COMPONENT; REQUIRED FOR 35S RRNA PROCESSING AND METHYLATION; SIMILAR S. CEREVISIAE NOP1:                                                                                                                                     |
| SPBC1703.12                         | 2  | 8.7%  | : UBIQUITIN CARBOXYL-TERMINAL HYDROLASE; SIMILAR TO S. CEREVISIAE UBP9:                                                                                                                                                                                        |
| SPAC637.04                          | 3  | 8.4%  | : HYPOTHETICAL PROTEIN; CONTAINS PFAM-B_33932; CONTAINS PFAM-B_33935; SIMILAR TO S. CEREVISIAE YGR198W NULL LETHAL; CONTAINS 3 TPR DOMAINS:                                                                                                                    |
| ARG5, SPBC56F2.09C                  | 2  | 8.2%  | : ARGININE-SPECIFIC CARBAMOYL PHOSPHATE SYNTHASE; SIMILAR TO S. CEREVISIAE CPA1:                                                                                                                                                                               |
| KMS1, SPAC3A11.05C                  | 2  | 8.1%  | : MEIOSIS SPECIFIC PROTEIN; MUTANT DISPLAYS DECREASED MEIOTIC RECOMBINATION; PUTATIVE                                                                                                                                                                          |

|                                     |   |      |                                                                                                                                                                                                                             |
|-------------------------------------|---|------|-----------------------------------------------------------------------------------------------------------------------------------------------------------------------------------------------------------------------------|
|                                     |   |      | SPINDLE POLE BODY COMPONENT:                                                                                                                                                                                                |
| LEU1, SPBC1A4.02C,<br>SPBC1E8.07C   | 2 | 8.1% | : 3-ISOPROPYLMALATE DEHYDROGENASE;<br>SIMILAR TO S. CEREVISIAE LEU2:                                                                                                                                                        |
| SPAC139.02C                         | 3 | 8.1% | : MC OXALOACETATE TRANSPORTER:                                                                                                                                                                                              |
| ILV1, SPBP35G2.07                   | 4 | 7.8% | : ACETOLACTATE SYNTHASE (ACETOHYDROXYACID<br>SYNTHASE); FIRST STEP IN VALINE AND<br>ISOLEUCINE BIOSYNTHESIS PATHWAY; SIMILAR TO<br>S. CEREVISIAE ILV2:                                                                      |
| PRP19, SPAC29A4.08C,<br>CWF8        | 4 | 7.8% | : PUTATIVE PRE-MRNA SPLICING FACTOR; WD<br>REPEAT PROTEIN; COMPLEXED WITH CDC5;<br>SIMILAR TO S. CEREVISIAE PRP19:                                                                                                          |
| SPAC821.05                          | 2 | 7.8% | : PUTATIVE EIF3 P40 EIF/SIGNALOSOME<br>COMPONENT; MOV DOMAIN; NO APPARENT S.<br>CEREVISIAE ORTHOLOG:                                                                                                                        |
| ECM2, SPCC550.02C,<br>CWF5          | 2 | 7.6% | : PUTATIVE PRE-MRNA SPLICING FACTOR; 40S<br>SNRNP- CONTAINING COMPLEX; RNA-BINDING<br>PROTEIN; SIMILAR TO S. CEREVISIAE ECM2:                                                                                               |
| GAR2, SPAC140.02                    | 3 | 7.4% | : GAR2 PROTEIN:                                                                                                                                                                                                             |
| SPAC664.03                          | 2 | 7.4% | : PUTATIVE DNA-DIRECTED RNA POLYMERASE II<br>REGULATOR:                                                                                                                                                                     |
| SPAC2E1P3.04                        | 2 | 7.2% | : PEROXISOMAL COPPER AMINE OXIDASE; NO<br>APPARENT S. CEREVISIAE ORTHOLOG:                                                                                                                                                  |
| HSP60, SPAC12G12.04,<br>MCP60       | 2 | 7.2% | : PUTATIVE MITOCHONDRIAL CHAPERONIN 60;<br>PUTATIVE SUCCINATE DEHYDROGENASE<br>ASSEMBLY; HEAT SHOCK PROTEIN 60:                                                                                                             |
| SPBC16E9.11C                        | 3 | 7.1% | : UBIQUITIN--PROTEIN LIGASE:                                                                                                                                                                                                |
| SPBC11B10.01, PI010,<br>SPBC32H8.14 | 2 | 7.0% | : GLYCOSYL TRANSFERASE:                                                                                                                                                                                                     |
| SPAC15A10.06                        | 2 | 6.7% | : CPA1 SODIUM ION/PROTON ANTIporter:                                                                                                                                                                                        |
| ITR1, SPAC4F8.15,<br>SPAC7D4.01     | 2 | 6.6% | : MFS MYO-INOSITOL TRANSPORTER:                                                                                                                                                                                             |
| SPAC13G7.05                         | 2 | 6.5% | : ACYL-COA-STEROL ACYLTRANSFERASE; SIMILAR<br>TO S. CEREVISIAE ARE2:                                                                                                                                                        |
| CLR6, SPBC36.05C                    | 2 | 6.4% | : HISTONE DEACETYLASE; RPD3-LIKE (CLASS 1);<br>SIMILAR TO S. CEREVISIAE RPD3; O59702;                                                                                                                                       |
| SPBP22H7.02C, PI029                 | 2 | 6.2% | : RNA-BINDING PROTEIN; 5 RRM RNA<br>RECOGNITION MOTIFS:                                                                                                                                                                     |
| SPAC13G7.04C                        | 2 | 6.2% | : HYPOTHETICAL PROTEIN; SIMILAR TO S.<br>CEREVISIAE TOS7; CONTAINS PFAM-B_7111;<br>CONTAINS 3 PREDICTED TRANSMEMBRANE<br>HELICES; PREDICTED N-TERMINAL SIGNAL<br>SEQUENCE; POSSIBLY FUNGAL SPECIFIC:                        |
| SNU66, SPAC167.03C                  | 2 | 6.2% | : PUTATIVE PRE-MRNA SPLICING FACTOR;<br>PUTATIVE U4/U6.U5 SNRNP COMPONENT;<br>PREDICTED COILED-COIL; SIMILAR TO S.<br>CEREVISIAE SNU66:                                                                                     |
| SPCC1682.03C                        | 3 | 6.2% | : HYPOTHETICAL PROTEIN; SEQUENCE ORPHAN:                                                                                                                                                                                    |
| SPBC25H2.11C                        | 2 | 6.1% | : BROMODOMAIN PROTEIN; PUTATIVE<br>TRANSCRIPTIONAL ACTIVATOR; PUTATIVE SAGA<br>COMPLEX ; SIMILAR TO S. CEREVISIAE SPT7:                                                                                                     |
| DIS1, SPCC736.14                    | 2 | 6.1% | : MICROTUBULE AND SPINDLE POLE BODY<br>ASSOCIATED PROTEIN P93DIS1:                                                                                                                                                          |
| SPBC106.14C                         | 3 | 6.1% | : POSSIBLY REQUIRED FOR ACTIN CYTOSKELETAL<br>ORGANISATION; SIMILAR TO S. CEREVISIAE SDA1:                                                                                                                                  |
| SPAC25B8.11                         | 2 | 6.1% | : PUTATIVE TRANSCRIPTIONAL REGULATOR; ZINC<br>FINGER PROTEIN; SIMILAR TO S. CEREVISIAE<br>DAL81 AN ACTIVATOR FOR ALLANTOIN,<br>4-AMINOBUTYRIC ACID (GABA), AND UREA<br>CATABOLIC GENES; FUNGAL BINUCLEAR CLUSTER<br>DOMAIN: |
| BPB1, SPCC962.06C,<br>SF1           | 2 | 6.1% | : ZINC FINGER PROTEIN; ZF-CCHC TYPE (ZINC<br>KNUCKLE); PUTATIVE TRANSCRIPTION OR<br>SPLICING FACTOR:                                                                                                                        |
| SPBC18E5.02C,<br>SPBC29A3.20C       | 2 | 6.1% | : PUTATIVE SERINE PALMITOYLTRANSFERASE<br>PUTATIVE SERINE PALMITOYLTRANSFERASE<br>SUBUNIT:                                                                                                                                  |
| SWI4, SPAC8F11.03                   | 2 | 6.0% | : MATING-TYPE SWITCHING PROTEIN; SIMILAR TO<br>S. CEREVISIAE MSH3:                                                                                                                                                          |

|                                    |   |      |                                                                                                                                                                                                                                            |
|------------------------------------|---|------|--------------------------------------------------------------------------------------------------------------------------------------------------------------------------------------------------------------------------------------------|
| SPBC20F10.05                       | 3 | 6.0% | : HYPOTHETICAL PROTEIN; SEQUENCE ORPHAN:                                                                                                                                                                                                   |
| POB1, SPBC1289.04C                 | 2 | 6.0% | : REQUIRED FOR CELL POLARITY; REQUIRED FOR ELONGATION; SIMILAR TO S. CEREVISIAE BOI1 AND BOI2; ESSENTIAL; CONTAINS PH DOMAIN; CONTAINS SAM DOMAIN:                                                                                         |
| SPBC691.02C, PI034                 | 2 | 6.0% | : PUTATIVE ENDOPLASMIC RETICULUM TO GOLGI TRANSPORT PROTEIN; SIMILAR TO S. CEREVISIAE TIP20:                                                                                                                                               |
| HMG1, SPCC162.09C                  | 3 | 5.9% | : 3-HYDROXY-3-METHYLGLUTARYL-COENZYME A REDUCTASE: O74425;Q10283;                                                                                                                                                                          |
| SPAC4G9.05                         | 2 | 5.9% | : RNA-BINDING PROTEIN; PUMILIO FAMILY: Q10238;                                                                                                                                                                                             |
| SPCC757.12                         | 2 | 5.8% | : PUTATIVE ALPHA-AMYLASE; NO APPARENT S. CEREVISIAE ORTHOLOG:                                                                                                                                                                              |
| URA1, SPAC22G7.06C                 | 7 | 5.7% | : CONTAINS GLUTAMINE-DEPENDENT CARBAMOYL- PHOSPHATESYNTASE; CONTAINS ASPARTATE CARBAMOYL TRANSFERASE; SIMILAR TO S. CEREVISIAE URA2:                                                                                                       |
| MTS4, SPBP19A11.03C                | 3 | 5.7% | : 26S PROTEASOME REGULATORY SUBUNIT:                                                                                                                                                                                                       |
| SPCC4B3.03C                        | 2 | 5.7% | : POSSIBLY REQUIRED FOR NORMAL MITOCHONDRIAL STRUCTURE; SIMILAR TO S. CEREVISIAE AMI3:                                                                                                                                                     |
| SPCC1223.13                        | 2 | 5.6% | : HYPOTHETICAL PROTEIN; SEQUENCE ORPHAN:                                                                                                                                                                                                   |
| SPBC16G5.15C                       | 2 | 5.6% | : FORK HEAD NUCLEAR SIGNALLING DOMAIN PROTEIN:                                                                                                                                                                                             |
| SPAC630.05                         | 2 | 5.5% | : TBC DOMAIN PROTEIN; PUTATIVE GTPASE ACTIVATING PROTEIN OF RAB-LIKE GTPASE:                                                                                                                                                               |
| PMA1, SPAC1071.10C                 | 2 | 5.4% | : P-TYPE PROTON ATPASE:                                                                                                                                                                                                                    |
| LEU2, SPAC9E9.03                   | 2 | 5.4% | : PUTATIVE 3-ISOPROPYLMALATE DEHYDRATASE:                                                                                                                                                                                                  |
| SPCC417.08                         | 4 | 5.3% | : PUTATIVE ELONGATION FACTOR 3:                                                                                                                                                                                                            |
| EFT2-1, SPAC513.01C, SPAPYUK71.04C | 3 | 5.3% | : ELONGATION FACTOR 2:                                                                                                                                                                                                                     |
| EFT2-2, SPCP31B10.07               | 3 | 5.3% | : ELONGATION FACTOR 2:                                                                                                                                                                                                                     |
| SPAC29A4.20                        | 2 | 5.3% | : PUTATIVE SUBUNIT OF ELONGATOR/RNAPII HOLOENZYME; PUTATIVE HISTONE ACETYLTRANSFERASE; SIMILAR TO S. CEREVISIAE ELP3:                                                                                                                      |
| SPAC1F8.07C                        | 2 | 5.2% | : PUTATIVE PYRUVATE DECARBOXYLASE:                                                                                                                                                                                                         |
| SPAC4A8.08C                        | 2 | 5.1% | : PUTATIVE VALYL-TRNA SYNTHETASE, MITOCHONDRIAL:                                                                                                                                                                                           |
| SPBC12C2.08                        | 2 | 5.1% | : DYNAMIN FAMILY; CONTAINS DYNAMIN GTPASE EFFECTOR DOMAIN; MORPHOLOGY AND CORTICAL LOCALIZATION OF MITOCHONDRIA; SIMILAR TO S. CEREVISIAE DNM1:                                                                                            |
| SPBC2D10.17                        | 2 | 4.8% | : ZINC FINGER PROTEIN; ZF-C2H2 TYPE; PREDICTED COILED-COIL REGION:                                                                                                                                                                         |
| SPBC28F2.08C                       | 2 | 4.8% | : SEL 1 REPEAT PROTEIN; LOW SIMILAR TO S. CEREVISIAE HRD3; PREDICTED N-TERMINAL SIGNAL SEQUENCE; CONTAINS 1 PREDICTED TRANSMEMBRANE HELIX; NO APPARENT S. CEREVISIAE ORTHOLOG:                                                             |
| PFK1, SPBC16H5.02                  | 3 | 4.7% | : 6-PHOSPHOFRUCTOKINASE BETA SUBUNIT; SIMILAR TO S. CEREVISIAE PFK2:                                                                                                                                                                       |
| APC5, SPAC959.09C, SPAP32A8.01C    | 2 | 4.6% | : PUTATIVE ANAPHASE-PROMOTING COMPLEX (APC); REQUIRED FOR CYCLIN DEGRADATION; REQUIRED FOR METAPHASE- ANAPHASE TRANSITION:                                                                                                                 |
| SPBC31F10.13C                      | 2 | 4.4% | : WD REPEAT PROTEIN; PUTATIVE HIRA PROTEIN; HISTONE TRANSCRIPTION REGULATOR:                                                                                                                                                               |
| CDC5, SPAC644.12                   | 2 | 4.4% | : CELL DIVISION CONTROL PROTEIN; TRANSCRIPTIONAL REGULATOR; MYB FAMILY DNA-BINDING PROTEIN; ESSENTIAL; REQUIRED FOR PRE-MRNA SPLICING; REQUIRED FOR G2/M PHASE PROGRESSION AND NUCLEAR DIVISION; FUNCTIONAL HOMOLOG OF S. CEREVISIAE CEF1: |
| TIF471, SPAC17C9.03                | 3 | 4.3% | : PUTATIVE EUKARYOTIC TRANSLATION INITIATION FACTOR EIF4G:                                                                                                                                                                                 |
| SPCC23B6.04C                       | 2 | 4.3% | : CONSERVED CRAL/TRIO DOMAIN PROTEIN;                                                                                                                                                                                                      |

|                                   |   |      |                                                                                                                                                                           |
|-----------------------------------|---|------|---------------------------------------------------------------------------------------------------------------------------------------------------------------------------|
|                                   |   |      | SEC14 CYTOSOLIC FACTOR FAMILY; POSSIBLY INVOLVED IN LIPID MOVEMENT BETWEEN MEMBRANES BY SIMILAR TO S. CEREVISIAE PDR16:                                                   |
| STE6, SPCC1442.01, SPCC1450.17    | 2 | 4.2% | : GUANINE-NUCLEOTIDE RELEASING FACTOR; INVOLVED IN CONJUGATION:                                                                                                           |
| SPAC20H4.01, SPAC631.03           | 2 | 4.1% | : HYPOTHETICAL PROTEIN; SIMILAR TO S. CEREVISIAE YDR398W NULL LETHAL:                                                                                                     |
| SPAC1250.01, SPAC29A4.21          | 2 | 4.0% | : PUTATIVE CHROMATIN REMODELING COMPLEX COMPONENT; PUTATIVE TRANSCRIPTIONAL ACTIVATOR COMPLEX; SNF2 FAMILY HELICASE; CONTAINS BROMODOMAIN; SIMILAR TO S. CEREVISIAE STH1: |
| SPAPB8E5.07C                      | 2 | 4.0% | : CONSERVED PROTEIN; SIMILAR TO S. CEREVISIAE YPL012W NULL LETHAL; CONTAINS PFAM-B_17883:                                                                                 |
| CWF10, SPBC215.12, SPEF2, SNU114  | 2 | 4.0% | : PUTATIVE PRE-MRNA SPLICING FACTOR; SIMILAR TO S. CEREVISIAE SNU114; SIMILAR TO HUMAN U5 SNRNP GTPASE-U5 SNRNP-SPECIFIC RIBOSOMAL TRANSLOCASE EF-2:                      |
| MAM1, SPBC25B2.02C, SPBC2G5.09C   | 3 | 3.9% | : ABC EFFLUX TRANSPORTER; PUTATIVE MATING FACTOR ABC EFFLUX TRANSPORTER - PUTATIVE MATING FACTOR:                                                                         |
| SPAC25G10.08                      | 2 | 3.9% | : EUKARYOTIC TRANSLATION INITIATION FACTOR 3 BETA SUBUNIT:                                                                                                                |
| SPAC4F10.16C                      | 2 | 3.7% | : P-TYPE CALCIUM ATPASE:                                                                                                                                                  |
| SPBC56F2.04                       | 3 | 3.4% | : SIMILAR TO HUMAN DRIM, A PROTEIN DIFFERENTIALLY PRODUCED IN METASTATIC AND NONMETASTATIC HUMAN BREAST CARCINOMA CELLS; SIMILAR TO S. CEREVISIAE YBLO04W:                |
| SPBC839.08C                       | 2 | 3.4% | : POSSIBLY REQUIRED FOR GLYCOSYLPHOSPHATIDYLINOSITOL (GPI) ANCHOR SYNTHESIS:                                                                                              |
| SPBC18H10.16                      | 2 | 3.3% | : CCC NA-K-CL TRANSPORTER:                                                                                                                                                |
| SPCC1259.02C                      | 2 | 3.3% | : CONSERVED PROTEIN; CONTAINS 5 TRANSMEMBRANE HELICES; CONTAINS PFAM_B-1571; CONTAINS M20 PEPTIDASE; PREDICTED N-TERMINAL SIGNAL SEQUENCE:                                |
| PST1, SPBC12C2.10C, SPBC21D10.01C | 3 | 3.2% | : CHROMATIN REMODELING FACTOR, SIN3 FAMILY COREPRESSOR:                                                                                                                   |
| SPCC576.05                        | 2 | 3.2% | : PUTATIVE LEUCINE PERMEASE TRANSCRIPTIONAL REGULATOR:                                                                                                                    |
| FAST1, SPAC926.09C                | 5 | 3.1% | : FATTY ACID SYNTHASE, SUBUNIT BETA:                                                                                                                                      |
| RGA2, SPAC26A3.09C                | 2 | 3.1% | : GTPASE ACTIVATOR; RHOGAP DOMAIN; SIMILAR TO S. CEREVISIAE BEM3:                                                                                                         |
| SPAC56F8.03                       | 2 | 3.1% | : PUTATIVE TRANSLATION INITIATION FACTOR IF-2; SIMILAR TO S. CEREVISIAE FUN12:                                                                                            |
| SPAC23C11.09                      | 2 | 3.1% | : ALANYL-TRNA SYNTHETASE, CYTOPLASMIC:                                                                                                                                    |
| SPCC330.11                        | 2 | 3.0% | : BTB DOMAIN AND ANKARYIN REPEAT CONTAINING PROTEIN.:                                                                                                                     |
| SPAC328.06                        | 2 | 3.0% | : UBIQUITIN CARBOXYL-TERMINAL HYDROLASE; SIMILAR TO S. CEREVISIAE UBP2:                                                                                                   |
| SPAC167.01                        | 2 | 3.0% | : PUTATIVE SERINE/THREONINE PROTEIN KINASE:                                                                                                                               |
| SPBC146.13C                       | 2 | 2.8% | : PUTATIVE MYOSIN I PROTEIN:                                                                                                                                              |
| CDC12, SPAC1F5.04C                | 2 | 2.7% | : REQUIRED FOR ACTIN RING ASSEMBLY:                                                                                                                                       |
| SPAC2G11.02                       | 2 | 2.7% | : HYPOTHETICAL PROTEIN; SIMILAR TO S. POMBE CUT1:                                                                                                                         |
| SPBC646.02                        | 2 | 2.7% | : HYPOTHETICAL PROTEIN; AQUARIUS ORTHOLOG; POSSIBLY INVOLVED IN PTGS; NO APPARENT S. CEREVISIAE ORTHOLOG:                                                                 |
| SYF1, SPBC211.02C, CWF3           | 2 | 2.7% | : PUTATIVE PRE-MRNA SPLICING FACTOR; SIMILAR TO S. CEREVISIAE SYF1:                                                                                                       |
| SPBC29A10.10C                     | 2 | 2.6% | : TRNA-SPLICING ENDONUCLEASE POSITIVE EFFECTOR:                                                                                                                           |
| SPAC24B11.12C                     | 2 | 2.6% | : P-TYPE CALCIUM ATPASE:                                                                                                                                                  |
| RGA1, SPBC3F6.05                  | 2 | 2.6% | : GTPASE ACTIVATOR; RHOGAP DOMAIN; LIM DOMAIN; INVOLVED IN ACTIN CYTOSKELETAL ORGANIZATION; INVOLVED IN FORMATION OF                                                      |

|                                            |   |      |                                                                                                                                                                                        |
|--------------------------------------------|---|------|----------------------------------------------------------------------------------------------------------------------------------------------------------------------------------------|
|                                            |   |      | CELL WALL AND SEPTUM; SIMILAR TO S. CEREVISIAE LRG1:                                                                                                                                   |
| SPBP19A11.04C                              | 3 | 2.5% | : PUTATIVE TRANSCRIPTIONAL ACTIVATOR; LEUCINE ZIPPER:                                                                                                                                  |
| RPB2, SPAC23G3.01, SPAC521.06              | 2 | 2.5% | : DNA-DIRECTED RNA POLYMERASE II 138 KD POLYPEPTIDE:                                                                                                                                   |
| MAK1, SPAC1834.08                          | 2 | 2.4% | : PUTATIVE SENSORY TRANSDUCTION HISTIDINE KINASE:                                                                                                                                      |
| SPAC3F10.11C                               | 2 | 2.4% | : ABC MULTIDRUG OR METAL ION EFFLUX TRANSPORTER:                                                                                                                                       |
| ADE3, SPAC6F12.10C, MIN11                  | 2 | 2.4% | : PUTATIVE PHOSPHORIBOSYLFORMYLGLYCINAMIDINE SYNTHASE; SUBCELLULAR LOCALIZATION OF GFP FUSION- CYTOPLASM:                                                                              |
| SPAC212.11                                 | 5 | 2.3% | : DNA HELICASE POSSIBLY PSEUDO (PARTIAL):                                                                                                                                              |
| RAD3, SPBC216.05                           | 2 | 2.2% | : ATR (ATM) CHECKPOINT KINASE; SIMILAR TO S. CEREVISIAE MEC1:                                                                                                                          |
| SPBC1826.01C, SPBC25B2.12.C, SPBC25B2.12C, | 2 | 2.2% | : TRANSCRIPTIONAL ACCESSORY PROTEIN (TAF) INVOLVED IN RNA POLYMERASE II TRANSCRIPTIONAL REPRESSION THROUGH INTERACTION WITH TATA-BINDING PROTEIN (TBP), SNF2P FAMILY OF DNA HELICASES: |
| SPCC1183.07                                | 2 | 2.2% | : PUTATIVE RRNA BIOGENESIS PROTEIN; RRP5 HOMOLOG; MULTIPLE S1 RNA BINDING DOMAIN PROTEIN:                                                                                              |
| MYO51, SPBC2D10.14C                        | 2 | 2.2% | : CLASS V MYOSIN; CYTOKINETIC ACTIN RING COMPONENT:                                                                                                                                    |
| SPBC947.10                                 | 2 | 2.2% | : ZINC FINGER PROTEIN; ZF-C3HC4 TYPE (RING FINGER):                                                                                                                                    |
| SPAPB8E5.09                                | 2 | 2.2% | : PUTATIVE 3' TO 5' DNA/RNA HELICASE; POSSIBLY INVOLVED IN RIBOSOMAL RNA PROCESSING; SIMILAR TO S. CEREVISIAE RVB1:                                                                    |
| SPBC31E1.06, SPBC800.01                    | 2 | 2.1% | : POSSIBLY INVOLVED IN CELL POLARITY BY SIMILARITY TO YEAST BMS1:                                                                                                                      |
| ALM1, SPAC1486.04C                         | 2 | 1.9% | : COILED-COIL PROTEIN; ASSOCIATES WITH THE MEDIAL REGION DURING MITOSIS; ABNORMAL LONG MORPHOLOGY PROTEIN:                                                                             |
| MOK12, SPBC32H8.13C                        | 2 | 1.8% | : ALPHA GLUCAN SYNTHASE:                                                                                                                                                               |
| SPAC167.07C, SPAC57A7.03C                  | 2 | 1.8% | : PUTATIVE UBIQUITIN TRANSFERASE PUTATIVE UBIQUITIN LIGASE:                                                                                                                            |
| SPAC19D5.04                                | 2 | 1.6% | : PUTATIVE UBIQUITIN LIGASE:                                                                                                                                                           |
| MOK13, SPBC16D10.05                        | 2 | 1.4% | : ALPHA-GLUCAN SYNTHASE:                                                                                                                                                               |
| BFRT1, SPCC18B5.01C, HBA2, SPCPJ732.04C    | 2 | 1.2% | : MFS BREFELDIN A EFFLUX TRANSPORTER:                                                                                                                                                  |
| SPAC23E2.02                                | 2 | 1.2% | : HYPOTHETICAL PROTEIN; SIMILAR TO S. POMBE SPBC146.09C; CONTAINS PFAM AMINO_OXIDASE DOMAIN; PUTATIVE HMG BOX DOMAIN; GFP FUSION NUCLEAR:                                              |
| SPP42, SPAC4F8.12C, CWF6                   | 2 | 0.9% | : U5 SNRNA-ASSOCIATED SPLICING FACTOR; PRE-MRNA SPLICING FACTOR; SIMILAR TO S. CEREVISIAE PRP8:                                                                                        |
| BGS4, SPCC1840.02C                         | 2 | 0.9% | : PUTATIVE 1,3-BETA-GLUCAN SYNTHASE SUBUNIT; CELL WALL SYNTHESIS:                                                                                                                      |
| VPS13A, SPBC21C3.01C, SPBC31F10.18C        | 2 | 0.6% | : PUTATIVE VACUOLAR SORTING PROTEIN:                                                                                                                                                   |

**Table S3.** List of proteins identified by mass spectrometry co-purifying with Dma1-3HA-TAP from mts3-1 arrested cells [Yeast strain used: YDM1972 *h- mts3-1 dma1-3HA-TAP::kanR sid4-GFP::kanR ura4-D18 leu1-32 ade6-21X*]. [2<sup>nd</sup> purification]

| Protein Name/Locus                           | #Unique peptides | Sequence Coverage | Descriptive Name                                                                                                                                         |
|----------------------------------------------|------------------|-------------------|----------------------------------------------------------------------------------------------------------------------------------------------------------|
| <b>DMA1</b> , SPAC17G8.10C                   | 24               | 46.4%             | : SPINDLE ASSEMBLY CHECKPOINT COMPONENT; PROTEIN TO PREVENT SEPTUM FORMATION AND PREMATURE EXIT FROM MITOSIS IF SPINDLE FUNCTION IS COMPROMISED: Q10322; |
| RPL23-1, SPAC3G9.03                          | 3                | 34.5%             | : 60S RIBOSOMAL PROTEIN L23: O42867;                                                                                                                     |
| RPL23-2, SPCC1322.11                         | 3                | 34.5%             | : 60S RIBOSOMAL PROTEIN L23: O42867;                                                                                                                     |
| RPL31, SPAC890.08                            | 5                | 34.5%             | : 60S RIBOSOMAL PROTEIN L31: O14384;Q9URX6;                                                                                                              |
| HSP70, SPCC1739.13                           | 14               | 31.7%             | : HEAT SHOCK PROTEIN 70 FAMILY: O59855;                                                                                                                  |
| ACT1, SPBC32H8.12C, CPS8, PI012              | 5                | 30.7%             | : ACTIN: P10989;Q10288;                                                                                                                                  |
| RPS29, SPBC1685.09                           | 2                | 30.4%             | : 40S RIBOSOMAL PROTEIN S29: O74329;                                                                                                                     |
| RPL25A, SPBC106.18                           | 6                | 29.8%             | : 60S RIBOSOMAL PROTEIN L25: Q10330;                                                                                                                     |
| RPL25B, SPBC4F6.04, RPL23A-2                 | 6                | 29.8%             | : 60S RIBOSOMAL PROTEIN L25: O74391;                                                                                                                     |
| RPS7, SPAC18G6.14C                           | 3                | 29.7%             | : 40S RIBOSOMAL PROTEIN S7: Q10101;                                                                                                                      |
| RPS23, SPAC23C11.02C                         | 3                | 28.7%             | : 40S RIBOSOMAL PROTEIN S23: P79057;                                                                                                                     |
| RPS23-2, SPBP4H10.13                         | 3                | 28.7%             | : 40S RIBOSOMAL PROTEIN S23: P79057;                                                                                                                     |
| RPL37A-1, SPBC800.04C, RPL43-1               | 2                | 28.7%             | : 60S RIBOSOMAL PROTEIN L37A/L43A: Q9HGL8;                                                                                                               |
| RPL37A-2, SPBC83.02C, RPL43-2                | 2                | 28.7%             | : 60S RIBOSOMAL PROTEIN L37A/L43: O13673;O94686;                                                                                                         |
| GPD1, SPBC32F12.11, TDH1                     | 8                | 28.3%             | : GLYCERALDEHYDE 3-PHOSPHATE DEHYDROGENASE: P78958;                                                                                                      |
| RPL35, SPCC613.05C                           | 3                | 27.9%             | : 60S RIBOSOMAL PROTEIN L35: O74904;                                                                                                                     |
| <b>DNT1</b> , SPBC25D12.02C                  | 9                | 24.2%             | : HYPOTHETICAL PROTEIN; SEQUENCE ORPHAN; SERINE- RICH: O74354;                                                                                           |
| EF1-B, SPBC839.15C                           | 8                | 23.9%             | : ELONGATION FACTOR 1 ALPHA-B: ;NOACC;                                                                                                                   |
| TEF1-E, SPCC794.09C, EF1A-E                  | 8                | 23.9%             | : ELONGATION FACTOR 1-ALPHA-E: O59818;P50522;                                                                                                            |
| EF1A-B, SPAC23A1.10, TEF1-B, TEF1-D, EF1A-B, | 8                | 23.9%             | : ELONGATION FACTOR 1 ALPHA-B/D: P78764;Q10119;                                                                                                          |
| RPL13, SPAC664.05                            | 2                | 23.6%             | : 60S RIBOSOMAL PROTEIN L13: O74175;                                                                                                                     |
| HSP16, SPBC3E7.02C                           | 2                | 22.4%             | : HEAT SHOCK PROTEIN 16: O14368;                                                                                                                         |
| SPAC13G7.02C                                 | 10               | 21.0%             | : HEAT SHOCK PROTEIN 70 FAMILY: Q10265;                                                                                                                  |
| RPS30-1, SPAC19B12.04                        | 2                | 19.7%             | : 40S RIBOSOMAL PROTEIN S30: O14314;O42952;                                                                                                              |
| RPS30-2, SPBC19G7.03C, YSPRS30               | 2                | 19.7%             | : 40S RIBOSOMAL PROTEIN S30: O14314;O42952;                                                                                                              |
| GPD3, SPBC354.12                             | 4                | 19.1%             | : GLYCERALDEHYDE 3-PHOSPHATE DEHYDROGENASE: O43026;                                                                                                      |
| RPS17-1, SPBC839.05C                         | 2                | 18.3%             | : 40S RIBOSOMAL PROTEIN S17: ;NOACC;                                                                                                                     |
| RPL17, SPBC2F12.04                           | 2                | 18.2%             | : 60S RIBOSOMAL PROTEIN L17: O14339;O59794;                                                                                                              |
| RPL26, SPBC29B5.03C                          | 2                | 17.5%             | : 60S RIBOSOMAL PROTEIN L26: P78946;                                                                                                                     |
| RPS14-1, SPAC3H5.05C                         | 2                | 17.3%             | : 40S RIBOSOMAL PROTEIN S14: O14150;                                                                                                                     |
| RPS14-2,                                     | 2                | 17.3%             | : 40S RIBOSOMAL PROTEIN S14: O14150;                                                                                                                     |

|                                                    |   |       |                                                                                                                                                                                                                                       |
|----------------------------------------------------|---|-------|---------------------------------------------------------------------------------------------------------------------------------------------------------------------------------------------------------------------------------------|
| SPBC18H10.13                                       |   |       |                                                                                                                                                                                                                                       |
| RPS5, SPAC8C9.08                                   | 2 | 17.2% | : 40S RIBOSOMAL PROTEIN S5: O14277;                                                                                                                                                                                                   |
| RPS5-2, SPAC328.10C                                | 2 | 17.2% | : 40S RIBOSOMAL PROTEIN S5: Q9P3T6;                                                                                                                                                                                                   |
| RPL28-1, SPBC776.11                                | 3 | 16.9% | : 60S RIBOSOMAL PROTEIN LL28B 27A: P57728;                                                                                                                                                                                            |
| RPL28-2, SPCC5E4.07                                | 3 | 16.9% | : 60S RIBOSOMAL PROTEIN L27A.2/L28A: P36585;                                                                                                                                                                                          |
| RPS13, SPAC6F6.07C                                 | 2 | 16.6% | : 40S RIBOSOMAL PROTEIN S13: P28189;                                                                                                                                                                                                  |
| RPS18-1,<br>SPBC16D10.11C                          | 2 | 15.8% | : 40S RIBOSOMAL PROTEIN S18: O94754;                                                                                                                                                                                                  |
| RPS18-2,<br>SPCC1259.01C,<br>SPCC825.06C           | 2 | 15.8% | : RIBOSOMAL PROTEIN SUBUNIT S18 40S<br>RIBOSOMAL PROTEIN S18: O94754; Q9USH4;                                                                                                                                                         |
| RPL8-1, SPAC1F7.13C,<br>RPK5A, RPL2-1,<br>SPAC21E1 | 4 | 15.0% | : 60S RIBOSOMAL PROTEIN L2A:<br>P08093;P14067;P36593;Q9UU31;                                                                                                                                                                          |
| RPL8-3, SPBC839.04,<br>RPK5-B, RPKD4               | 4 | 15.0% | : 60S RIBOSOMAL PROTEIN L8:<br>P08093;P14067;P36593;Q9UU31;                                                                                                                                                                           |
| RPL8-2, SPBC2F12.07C,<br>RPK37, RPK5B              | 4 | 15.0% | : 60S RIBOSOMAL PROTEIN L8 OR L2:<br>P08093;P14067;P36593;Q9UU31;                                                                                                                                                                     |
| RPL44, SPAC1687.06C,<br>RPL28                      | 2 | 14.9% | : 60S RIBOSOMAL PROTEIN L28/L44; NO<br>APPARENT S. CEREVISIAE ORTHOLOG:<br>O14069;P36585;                                                                                                                                             |
| RAD25, SPAC17A2.13C                                | 3 | 14.8% | : DNA DAMAGE CHECKPOINT PROTEIN; 14-3-3<br>PROTEIN; SIMILAR TO S. CEREVISIAE BMH2:<br>P42657;                                                                                                                                         |
| RPT3, SPCC576.10C                                  | 2 | 8.2%  | : 19S PROTEASOME REGULATORY SUBUNIT:<br>O74894;                                                                                                                                                                                       |
| RPT6, SPBC23G7.12C,<br>LET1                        | 2 | 7.7%  | : 19S PROTEASOME REGULATORY SUBUNIT:<br>P41836;                                                                                                                                                                                       |
| HSP60, SPAC12G12.04,<br>MCP60                      | 3 | 7.4%  | : PUTATIVE MITOCHONDRIAL CHAPERONIN 60;<br>PUTATIVE SUCCINATE DEHYDROGENASE<br>ASSEMBLY; HEAT SHOCK PROTEIN 60:<br>Q09864;Q10285;                                                                                                     |
| SPBC83.08                                          | 2 | 7.1%  | : PUTATIVE 3' TO 5' DNA/RNA HELICASE; POSSIBLY<br>INVOLVED IN RIBOSOMAL RNA PROCESSING;<br>POSSIBLY PROTEIN FOR SNORNA<br>ACCUMULATION; POSSIBLY REQUIRED FOR THE<br>PRODUCTION OF SNORNAS; SIMILAR TO S.<br>CEREVISIAE RVB1: O94692; |
| SPBC800.13                                         | 2 | 6.7%  | : SERINE RICH HYPOTHETICAL POSSIBLY NUCLEAR;<br>SEQUENCE ORPHAN; HAS LOW SIMILAR TO<br>HISTONE LIKE TRANSCRIPTION FACTORS, AND A<br>DEAD BOX HELICASE- BELOW THRESHOLD;<br>SUBCELLULAR LOCALIZATION OF GFP<br>FUSION-NUCLEUS: Q9HGK9; |
| PMA1, SPAC1071.10C                                 | 4 | 6.5%  | : P-TYPE PROTON ATPASE: P09627;                                                                                                                                                                                                       |
| RPT6, SPBC23G7.12C,<br>LET1                        | 2 | 7.7%  | : 19S PROTEASOME REGULATORY SUBUNIT:<br>P41836;                                                                                                                                                                                       |
| RPT4, SPCC1682.16,<br>SPCC306.01                   | 2 | 6.4%  | : 19S PROTEASOME REGULATORY SUBUNIT:<br>O74445;Q9Y7R2;                                                                                                                                                                                |
| SPAC10F6.01C,<br>SPAC4C5.05C                       | 3 | 4.3%  | : PUTATIVE SULPHITE REDUCTASE; POSSIBLY<br>INVOLVED IN SULPHATE ASSIMILATION; CELL<br>WALL ORGANISATION AND BIOGENESIS; SIMILAR<br>TO S. CEREVISIAE MET5 PUTATIVE FERREDOXIN<br>OXIDOREDUCTASE: O14167;                               |
| EFT2-1, SPAC513.01C,<br>SPAPYUK71.04C              | 2 | 4.3%  | : ELONGATION FACTOR 2:<br>O14460;Q9USG7;Q9USZ9;Q9UT64;                                                                                                                                                                                |



|                                                   |   |      |                                                                                                                                                       |
|---------------------------------------------------|---|------|-------------------------------------------------------------------------------------------------------------------------------------------------------|
| EFT2-2, SPCP31B10.07                              | 2 | 4.3% | : ELONGATION FACTOR 2:<br>O14460;Q9USG7;Q9USZ9;Q9UT64;                                                                                                |
| URA1, SPAC22G7.06C                                | 5 | 4.1% | : CONTAINS GLUTAMINE-DEPENDENT<br>CARBAMOYL- PHOSPHATESYNTASE; CONTAINS<br>ASPARTATE CARBAMOYL TRANSFERASE; SIMILAR<br>TO S. CEREVISIAE URA2: Q09794; |
| TIF33, SPAC1E11.01C,<br>SPAC4A8.16C,<br>SPAC823.0 | 2 | 3.1% | : TRANSLATION INTIATION FACTOR EIF-3<br>SUBUNIT: O13885;O14164;P78791;Q9P6P4;                                                                         |
| MTS4, SPBP19A11.03C                               | 2 | 3.1% | : 26S PROTEASOME REGULATORY SUBUNIT:<br>P87048;Q9HDV7;                                                                                                |
| SPCC584.01C                                       | 2 | 2.7% | : PUTATIVE SULFITE REDUCTASE: Q09878;                                                                                                                 |
| SPCP31B10.06                                      | 2 | 2.1% | : C2 DOMAIN FAMILY PROTEIN; SIMILAR TO S.<br>CEREVISIAE YML072C: Q9USG8;                                                                              |
| LSD1, SPAC4A8.11C,<br>FAS2                        | 2 | 1.7% | : FATTY ACID SYNTHASE, SUBUNIT<br>ALPHA:O14163;P78973;Q10289;Q96WT6;<br>Q96WT7;Q96WT8;                                                                |

**Table S4.** List of proteins identified by mass spectrometry co-purifying with Dnt1-3HA-TAP from wild-type cells [Yeast strain used: YDM2460 *h+ dnt1-3HA-TAP leu1-32 ura4-D18 ade6-210*].

| Protein Name/Locus | #Unique peptides | Sequence Coverage | Descriptive Name                                                                                                      |
|--------------------|------------------|-------------------|-----------------------------------------------------------------------------------------------------------------------|
| SPCC1739.13        | 57               | 57.3%             | ssa2   heat shock protein 70 family  Schizosaccharomyces pombe  chr3                                                  |
| SPBC25D12.02c      | 54               | 51.3%             | (dnt1) hypothetical protein  Schizosaccharomyces pombe  chr 2      Manual                                             |
| SPBC1709.05        | 18               | 48.9%             | sks2 hsc1 heat shock protein 70 family (PMID 8973306)  Schizosaccharomyces pombe  chr 2                               |
| SPAC23C11.11       | 17               | 47.0%             | cka1 orb5 serine/threonine protein kinase  Schizosaccharomyces pombe  chr1                                            |
| SPAC1851.03        | 7                | 46.3%             | ckb1   protein kinase CK2 complex (beta subunit) (regulatory subunit) (PMID 8264625)  Schizosaccharomyces pombe  chr1 |
| SPBC106.03         | 13               | 46.2%             | hypothetical protein  Schizosaccharomyces pombe  chr 2                                                                |
| SPAC664.11         | 30               | 45.0%             | ssc1 ssp1 heat shock protein 70 family (PMID 2123810)  Schizosaccharomyces pombe  chr 1                               |
| SPCC576.08c        | 7                | 44.3%             | rps2   40S ribosomal protein S2  Schizosaccharomyces pombe  chr 3                                                     |
| SPAC13G7.02c       | 40               | 41.9%             | ssa1   heat shock protein 70 family  Schizosaccharomyces pombe  chr 1                                                 |
| SPAC17G8.10c       | 7                | 37.1%             | dma1   zinc finger protein  Schizosaccharomyces pombe  chr 1                                                          |
| SPBC16H5.02        | 27               | 36.7%             | pfk1   6-phosphofructokinase (predicted)  Schizosaccharomyces pombe  chr 2                                            |
| SPAC22A12.15c      | 24               | 36.2%             | bip1 bip BiP (PMID 1373379)  Schizosaccharomyces pombe  chr 1                                                         |
| SPAC23A1.10        | 21               | 35.9%             | ef1a-b   translation elongation factor (alpha 2 subunit) (PMID 9099890)  Schizosaccharomyces pombe  chr 1             |
| SPCC794.09c        | 21               | 35.9%             | ef1a-a   translation elongation factor 1 (alpha 1 subunit) (PMID 9099890)  Schizosaccharomyces pombe  chr 3           |
| SPBC839.15c        | 21               | 35.9%             | ef1a-c   translation elongation factor (alpha 1 subunit) (PMID 9099890)  Schizosaccharomyces pombe  chr 2             |
| SPBC32F12.11       | 7                | 35.7%             | gpd1 tdh1 glyceraldehyde 3-phosphate dehydrogenase  Schizosaccharomyces pombe  chr 2                                  |
| SPBC11C11.06c      | 3                | 35.4%             | hypothetical protein  Schizosaccharomyces pombe  chr 2                                                                |
| SPAC4A8.11c        | 42               | 33.6%             | lsd1 fas2 fatty acid synthase (subunit alpha) (PMID 9693066)  Schizosaccharomyces pombe  chr 1                        |
| SPBP22H7.08        | 5                | 33.3%             | rps1002 rps10-2, rps10B 40S ribosomal protein S10  Schizosaccharomyces pombe  chr 2                                   |
| SPBC32H8.12c       | 12               | 32.0%             | act1 cps8 actin (PMID 1524835)  Schizosaccharomyces pombe  chr 2                                                      |
| SPCC16A11.10c      | 2                | 30.2%             | oca8   cytochrome b5 (predicted)  Schizosaccharomyces pombe  chr 3                                                    |
| SPCC5E4.05c        | 6                | 28.8%             | abhydrolase family  Schizosaccharomyces                                                                               |

|               |    |       |                                                                                                          |
|---------------|----|-------|----------------------------------------------------------------------------------------------------------|
|               |    |       | pombe   chr 3                                                                                            |
| SPAC926.09c   | 40 | 27.9% | fas1     fatty acid synthase (subunit beta) (predicted)   Schizosaccharomyces pombe   chr 1              |
| SPBC1815.01   | 6  | 26.7% | eno101   eno1   enolase   Schizosaccharomyces pombe   chr 2                                              |
| SPCC1906.01   | 5  | 26.4% | mannose-1-phosphate guanyltransferase   Schizosaccharomyces pombe   chr 3                                |
| SPBC609.05    | 7  | 25.6% | FACT complex component   Schizosaccharomyces pombe   chr 2                                               |
| SPBC365.03c   | 4  | 25.6% | rpl2101   rpl21, rpl21-1   60S ribosomal protein L21   Schizosaccharomyces pombe   chr 2                 |
| SPBC16H5.06   | 3  | 25.4% | rip1     ubiquinol-cytochrome-c reductase complex (sensu Eukarya)   Schizosaccharomyces pombe   chr 2    |
| SPBC16G5.14c  | 5  | 25.3% | rps3     40S ribosomal protein S3   Schizosaccharomyces pombe   chr 2                                    |
| SPAC3A12.14   | 2  | 25.3% | cam1     calmodulin (PMID 3035538)   Schizosaccharomyces pombe   chr 1                                   |
| SPAC17C9.09c  | 2  | 25.3% | tim13     protein translocase subunit   Schizosaccharomyces pombe   chr 1                                |
| SPAC1F8.06    | 6  | 25.2% | glycoprotein (predicted)   Schizosaccharomyces pombe   chr 1                                             |
| SPBC3E7.02c   | 2  | 25.2% | hsp16     heat shock protein   Schizosaccharomyces pombe   chr 2                                         |
| SPAC26F1.06   | 4  | 25.1% | gpm1     phosphoglycerate mutase (PMID 8110200)   Schizosaccharomyces pombe   chr 1                      |
| SPAC3H5.12c   | 6  | 24.8% | rpl501   rpl5-1, rpl5   60S ribosomal protein L5   Schizosaccharomyces pombe   chr 1                     |
| SPBC11C11.09c | 6  | 24.8% | rpl502   rpl5-2, rpl5b   60S ribosomal protein L5   Schizosaccharomyces pombe   chr 2                    |
| SPAC17A2.13c  | 5  | 24.8% | rad25     14-3-3 protein   Schizosaccharomyces pombe   chr 1                                             |
| SPAC17H9.12c  | 4  | 24.8% | NADH-cytochrome reductase (predicted)   Schizosaccharomyces pombe   chr 1                                |
| SPBC530.10c   | 5  | 24.5% | anc1     adenine nucleotide carrier (PMID 8675018)   Schizosaccharomyces pombe   chr 2                   |
| SPAC4H3.10c   | 9  | 24.4% | pyk1     pyruvate kinase (predicted)   Schizosaccharomyces pombe   chr 1                                 |
| SPBC27.08c    | 7  | 24.1% | met3   SPBC28F2.01c   sulfate adenylyltransferase (predicted)   Schizosaccharomyces pombe   chr 2        |
| SPBC19F8.08   | 5  | 24.0% | rps401   rps4-1, rps4, SPBC25H2.17c   40S ribosomal protein S4A/S4.1   Schizosaccharomyces pombe   chr 2 |
| SPBC21B10.10  | 5  | 24.0% | rps402   rps4-2   40S ribosomal protein S4   Schizosaccharomyces pombe   chr 2                           |
| SPAC22H12.04c | 5  | 23.8% | rps102   rps1-2, rps3a-2   40S ribosomal protein S3a   Schizosaccharomyces pombe   chr 1                 |
| SPAC13G6.02c  | 5  | 23.8% | rps101   rps1-1, rps3a-1   40S ribosomal protein S3a   Schizosaccharomyces pombe   chr 1                 |
| SPCC18.14c    | 4  | 23.7% | rpp0     60S acidic ribosomal protein (predicted)   Schizosaccharomyces pombe   chr 3                    |
| SPBC18E5.04   | 5  | 23.5% | rpl1001   rpl10-1   60S ribosomal protein L10   Schizosaccharomyces pombe   chr 2                        |
| SPAP7G5.05    | 5  | 23.5% | rpl1002   rpl10-2   60S ribosomal protein L10   Schizosaccharomyces pombe   chr 1                        |

|               |    |       |                                                                                                      |
|---------------|----|-------|------------------------------------------------------------------------------------------------------|
| SPCC364.03    | 7  | 23.0% | rpl1702 rpl17-2, rpl17 60S ribosomal protein L17 Schizosaccharomyces pombe chr 3                     |
| SPCC4G3.13c   | 2  | 22.3% | CUE domain protein  Schizosaccharomyces pombe chr 3                                                  |
| SPBC29A3.04   | 8  | 22.0% | rpl701 rpl7a 60S ribosomal protein L7a (L8) Schizosaccharomyces pombe chr2                           |
| SPBC1703.13c  | 4  | 21.9% | mitochondrial carrier  Schizosaccharomyces pombe chr 2                                               |
| SPBC4C3.07    | 4  | 21.9% | COP9/signalosome complex (subunit 6) (predicted)  Schizosaccharomyces pombe chr 2                    |
| SPCC584.01c   | 16 | 21.8% | sulfite reductase NADPH flavoprotein subunit (predicted)  Schizosaccharomyces pombe chr 3            |
| SPBP8B7.06    | 2  | 21.8% | rpp201 rpp2, rpp2-1 60S acidic ribosomal protein (P2A subunit)  Schizosaccharomyces pombe chr 2      |
| SPCC576.10c   | 5  | 21.6% | rpt3  19S proteasome regulatory subunit Schizosaccharomyces pombe chr 3                              |
| SPBC2F12.04   | 5  | 21.4% | rpl1701 rpl17, rpl17-1 60S ribosomal protein L17 Schizosaccharomyces pombe chr 2                     |
| SPAC29A4.04c  | 7  | 21.3% | TruB family Schizosaccharomyces pombe chr 1                                                          |
| SPAC30C2.04   | 7  | 21.3% | cofactor for methionyl-and glutamyl-tRNA synthetases (predicted) Schizosaccharomyces pombe chr 1     |
| SPBC2D10.08c  | 4  | 21.1% | mitochondrial ribosomal protein L4  Schizosaccharomyces pombe chr 2                                  |
| SPBC28E12.01c | 2  | 20.7% | apc13 SPBC9B6.12c anaphase-promoting complex (APC) (PMID 12477395)  Schizosaccharomyces pombe chr 2  |
| SPBC354.12    | 4  | 20.6% | gpd3  glyceraldehyde 3-phosphate dehydrogenase Schizosaccharomyces pombe chr 2                       |
| SPCC285.17    | 8  | 20.6% | spp27 uaf30 transcription factor  Schizosaccharomyces pombe chr 3                                    |
| SPBC20F10.01  | 3  | 20.6% | gar1 SPBC25H2.01c ribonucleoprotein (RNP) complex (PMID 8502556)  Schizosaccharomyces pombe chr 2    |
| SPBC16G5.11c  | 2  | 20.5% | bag101 bag1-a, bag1 BAG-family  Schizosaccharomyces pombe chr 2                                      |
| SPAC1F7.04    | 2  | 20.3% | rho1  small GTPase  Schizosaccharomyces pombe chr 1                                                  |
| SPAC24C9.12c  | 6  | 19.9% | serine hydroxymethyltransferase (predicted) Schizosaccharomyces pombe chr 1                          |
| SPAC6B12.12   | 7  | 19.7% | tom70  mitochondrial outer membrane translocase complex (predicted)  Schizosaccharomyces pombe chr 1 |
| SPAC694.02    | 24 | 19.6% | DEAD/DEAH box helicase  Schizosaccharomyces pombe chr 1                                              |
| SPCC306.08c   | 3  | 19.6% | malate dehydrogenase (predicted)  Schizosaccharomyces pombe chr3                                     |
| SPAC30C2.02   | 3  | 19.5% | mmd1  HEAT repeat  Schizosaccharomyces pombe chr 1                                                   |
| SPBC2D10.10c  | 3  | 19.3% | fib1 fib fibrillar  Schizosaccharomyces pombe chr 2                                                  |
| SPBC336.10c   | 2  | 19.1% | tif512  translation initiation factor  Schizosaccharomyces pombe chr 2                               |

|               |    |       |                                                                                             |
|---------------|----|-------|---------------------------------------------------------------------------------------------|
| SPBC1734.11   | 5  | 18.9% | chaperone regulator activity (predicted) Schizosaccharomyces pombe chr 2                    |
| SPBP19A11.03c | 10 | 18.7% | mts4 rpn1 19S proteasome regulatory subunit Schizosaccharomyces pombe chr 2                 |
| SPCC13B11.01  | 5  | 18.6% | adh1 adh alcohol dehydrogenase Schizosaccharomyces pombe chr3                               |
| SPAC19G12.08  | 4  | 18.4% | fatty acid hydroxylase (predicted) Schizosaccharomyces pombe chr 1                          |
| SPCC5E4.07    | 2  | 18.2% | rpl2802 rpl28-2 60S ribosomal protein L27a.2/L28A Schizosaccharomyces pombe chr 3           |
| SPAC8E11.02c  | 4  | 18.1% | rad24 involved in DNA repair Schizosaccharomyces pombe chr 1                                |
| SPAC17A5.15c  | 8  | 17.9% | glutamate-tRNA ligase (predicted) Schizosaccharomyces pombe chr 1                           |
| SPBC29A3.18   | 3  | 17.9% | cyt1 cytochrome c1 (predicted) Schizosaccharomyces pombe chr 2                              |
| SPBC2G5.06c   | 5  | 17.6% | hmt2 cad1 sulfide-quinone oxidoreductase Schizosaccharomyces pombe chr 2                    |
| SPAC19G12.06c | 2  | 17.6% | hta2 histone H2A (beta) Schizosaccharomyces pombe chr1                                      |
| SPCC622.08c   | 2  | 17.4% | hta1 histone H2A (alpha) (PMID 3018512) Schizosaccharomyces pombe chr 3                     |
| SPAC18G6.12c  | 3  | 17.5% | B22918-1  B22918 domain Schizosaccharomyces pombe chr 1                                     |
| SPBC14F5.03c  | 11 | 17.4% | kap123 karyopherin Schizosaccharomyces pombe chr 2                                          |
| SPBC1718.04   | 7  | 17.3% | phosphate acyltransferase (SMART) Schizosaccharomyces pombe chr2                            |
| SPCC1281.06c  | 4  | 16.9% | acyl-coA desaturase (predicted) Schizosaccharomyces pombe chr3                              |
| SPAC3A11.10c  | 5  | 16.9% | microsomal dipeptidase (predicted) Schizosaccharomyces pombe chr1                           |
| SPAC9.07c     | 4  | 16.9% | GTP binding Schizosaccharomyces pombe chr 1                                                 |
| SPBC36B7.07   | 2  | 16.9% | tlg1  SNARE Schizosaccharomyces pombe chr 2                                                 |
| SPBC36B7.07   | 2  | 16.9% | tlg1  SNARE Schizosaccharomyces pombe chr 2                                                 |
| SPCC16C4.05   | 2  | 16.9% | RNase P and RNase MRP subunit (predicted) Schizosaccharomyces pombe chr 3                   |
| SPBC26H8.06   | 2  | 16.8% | grx5 arsenate reductase (glutaredoxin) activity (predicted) Schizosaccharomyces pombe chr 2 |
| SPAC11E3.03   | 2  | 16.7% | pcs1 monopolin complex component (predicted) Schizosaccharomyces pombe chr 1                |
| SPCC970.03    | 2  | 16.6% | cytochrome b5 reductase (predicted) Schizosaccharomyces pombe chr3                          |
| SPAC227.02c   | 3  | 16.6% | conserved eukaryotic protein Schizosaccharomyces pombe chr1                                 |
| SPAC13A11.02c | 4  | 16.4% | cyp51 cytochrome p45051 (predicted) Schizosaccharomyces pombe chr1                          |
| SPAC57A10.12c | 6  | 16.3% | ura3 dihydroorotate dehydrogenase Schizosaccharomyces pombe chr1                            |
| SPAC3A11.07   | 9  | 16.2% | NADH dehydrogenase (predicted) Schizosaccharomyces pombe chr1                               |

|               |    |       |                                                                                                                                         |
|---------------|----|-------|-----------------------------------------------------------------------------------------------------------------------------------------|
| SPBC8D2.17    | 3  | 16.0% | galactosyltransferase Schizosaccharomyces pombe chr 2                                                                                   |
| SPAC23C11.17  | 4  | 15.9% | conserved eukaryotic protein Schizosaccharomyces pombe chr 1                                                                            |
| SPAPB1A11.02  | 2  | 15.9% | esterase/lipase (predicted) Schizosaccharomyces pombe chr 1                                                                             |
| SPAC1071.10c  | 9  | 15.5% | pma1  P-type proton ATPase (PMID 12707717) Schizosaccharomyces pombe chr 1                                                              |
| SPBC26H8.08c  | 4  | 15.3% | GTPase activity (predicted) Schizosaccharomyces pombe chr 2                                                                             |
| SPBC31F10.06c | 2  | 15.3% | sar1  GTP binding Schizosaccharomyces pombe chr 2                                                                                       |
| SPAC1B1.02c   | 5  | 15.1% | NAD kinase (predicted) Schizosaccharomyces pombe chr 1                                                                                  |
| SPAC26F1.07   | 2  | 15.0% | aldo/keto reductase Schizosaccharomyces pombe chr 1                                                                                     |
| SPAC1399.04c  | 2  | 15.0% | uracil phosphoribosyltransferase (predicted) Schizosaccharomyces pombe chr 1                                                            |
| SPBC56F2.09c  | 3  | 14.9% | arg5  carbamoyl-phosphate synthase (predicted) Schizosaccharomyces pombe chr 2                                                          |
| SPAC644.15    | 2  | 14.7% | rpp101 rpp1-1 60S acidic ribosomal protein Schizosaccharomyces pombe chr 1                                                              |
| SPBC3B9.13c   | 2  | 14.5% | rpp102 rpp1-2 60S acidic ribosomal protein Schizosaccharomyces pombe chr 2                                                              |
| SPBC16H5.08c  | 4  | 14.6% | ATPase Schizosaccharomyces pombe chr 2                                                                                                  |
| SPBC1773.10c  | 5  | 14.6% | asparagine-tRNA ligase (predicted) Schizosaccharomyces pombe chr 2                                                                      |
| SPAC4F10.14c  | 2  | 14.6% | btf3  nascent polypeptide-associated complex (predicted) (PMID 8809106) Schizosaccharomyces pombe chr 1                                 |
| SPBP4H10.04   | 4  | 14.4% | ppb1  serine/threonine protein phosphatase (catalytic subunit) Schizosaccharomyces pombe chr 2                                          |
| SPAC22G7.06c  | 20 | 14.3% | ura1  ATP binding Schizosaccharomyces pombe chr 1                                                                                       |
| SPAC222.12c   | 6  | 14.3% | atp2  F1-ATPase (beta subunit) (PMID 6228552) Schizosaccharomyces pombe chr 1                                                           |
| SPBC2G5.02c   | 4  | 14.2% | protein kinase CK2 complex (regulatory subunit) (predicted) Schizosaccharomyces pombe chr 2                                             |
| SPBC14F5.05c  | 3  | 14.1% | sam1  S-adenosylmethionine synthetase (PMID 10620770) Schizosaccharomyces pombe chr 2                                                   |
| SPBC83.08     | 5  | 14.0% | AAA family ATPase Schizosaccharomyces pombe chr 2                                                                                       |
| SPBC776.15c   | 4  | 13.7% | dihydrolipoamide S-succinyltransferase (e2 component of oxoglutarate dehydrogenase complex) (predicted) Schizosaccharomyces pombe chr 2 |
| SPAC821.11    | 4  | 13.7% | pro1  gamma-glutamyl phosphate reductase (predicted) Schizosaccharomyces pombe chr 1                                                    |
| SPBC13G1.01c  | 3  | 13.5% | mitochondrial ribosomal protein S4 Schizosaccharomyces pombe chr 2                                                                      |
| SPBC24C6.05   | 2  | 13.5% | sec28  coatomer (epsilon subunit) (predicted) Schizosaccharomyces pombe chr 2                                                           |
| SPAC23G3.06   | 4  | 13.4% | ribonucleoprotein (RNP) complex (predicted) (PMID 12068309) Schizosaccharomyces                                                         |

|               |    |       |                                                                                                            |
|---------------|----|-------|------------------------------------------------------------------------------------------------------------|
|               |    |       | pombe  chr1                                                                                                |
| SPAC29B12.04  | 2  | 13.2% | snz1   involved in pyridoxine metabolism (predicted)  Schizosaccharomyces pombe  chr 1                     |
| SPBC19G7.10c  | 6  | 13.0% | topoisomerase associated protein (predicted)  Schizosaccharomyces pombe  chr 2                             |
| SPAC323.02c   | 2  | 13.0% | 20S proteasome component (alpha 5)  Schizosaccharomyces pombe  chr1                                        |
| SPAC19G12.12  | 2  | 12.9% | dlp1   coq1   decaprenyl diphosphate synthase (subunit 2) (PMID 14519123)  Schizosaccharomyces pombe  chr1 |
| SPAC4F10.10c  | 3  | 12.8% | mannosyltransferase complex (predicted)  Schizosaccharomyces pombe  chr 1                                  |
| SPBC17D1.06   | 4  | 12.5% | DEAD/DEAH box helicase  Schizosaccharomyces pombe  chr2                                                    |
| SPAC1B2.03c   | 2  | 12.3% | GNS1/SUR4 family protein  Schizosaccharomyces pombe  chr1                                                  |
| SPBC16E9.14c  | 2  | 12.2% | cation efflux family  Schizosaccharomyces pombe  chr2                                                      |
| SPBC1A4.05    | 8  | 12.1% | hypothetical protein  Schizosaccharomyces pombe  chr2                                                      |
| SPBP4H10.18c  | 2  | 12.1% | hypothetical protein  Schizosaccharomyces pombe  chr2                                                      |
| SPBC27B12.09c | 2  | 11.9% | transporter  Schizosaccharomyces pombe  chr 2                                                              |
| SPBC1539.09c  | 4  | 11.7% | trp1   anthranilate synthase (component II)  Schizosaccharomyces pombe  chr2                               |
| SPCC794.12c   | 4  | 11.7% | mae2   malic enzyme  Schizosaccharomyces pombe  chr3                                                       |
| SPBC106.06    | 2  | 11.6% | cct4   chaperonin-containing T-complex  Schizosaccharomyces pombe  chr2                                    |
| SPAC13G6.11c  | 4  | 11.6% | mevalonate kinase activity (predicted)  Schizosaccharomyces pombe  chr 1                                   |
| SPAC25G10.05c | 4  | 11.6% | his1   ATP phosphoribosyltransferase (PMID 7732725)  Schizosaccharomyces pombe  chr 1                      |
| SPBC19C7.12c  | 3  | 11.5% | mannosyltransferase (predicted)  Schizosaccharomyces pombe  chr2                                           |
| SPAC2F3.02    | 2  | 11.5% | TPR repeat protein  Schizosaccharomyces pombe  chr1                                                        |
| SPBC18H10.17c | 2  | 11.4% | sequence orphan  Schizosaccharomyces pombe  chr2                                                           |
| SPBC26H8.07c  | 2  | 11.2% | nda3   ben1, alp12   tubulin (beta) (PMID 6094012)  Schizosaccharomyces pombe  chr 2                       |
| SPAC22F3.09c  | 3  | 11.1% | mcs1   res2, pct1   transcription factor  Schizosaccharomyces pombe  chr1                                  |
| SPAC10F6.01c  | 10 | 11.0% | SPAC4C5.05c   sulfite reductase (predicted)  Schizosaccharomyces pombe  chr 1                              |
| SPBC1105.02c  | 3  | 11.0% | lys4   homocitrate synthase (predicted)  Schizosaccharomyces pombe  chr2                                   |
| SPAC4H3.01    | 4  | 11.0% | DNAJ domain protein  Schizosaccharomyces pombe  chr1                                                       |
| SPAC17G6.13   | 3  | 10.9% | slt1   involved in response to drug  Schizosaccharomyces pombe  chr1                                       |
| SPAC1783.08c  | 2  | 10.9% | rpl1502   rpl15-2   60S ribosomal protein L15b  Schizosaccharomyces pombe  chr1                            |
| SPCC576.11    | 2  | 10.9% | rpl15   60S ribosomal protein L15                                                                          |

|               |   |       |                                                                                                                     |
|---------------|---|-------|---------------------------------------------------------------------------------------------------------------------|
|               |   |       | Schizosaccharomyces pombe   chr3                                                                                    |
| SPAC959.02    | 2 | 10.7% | sec17   alpha SNAP  Schizosaccharomyces pombe   chr1                                                                |
| SPAC637.10c   | 2 | 10.7% | pus1 rpn10 19S proteasome regulatory subunit Schizosaccharomyces pombe   chr 1                                      |
| SPBC146.14c   | 5 | 10.6% | sec26 SPBC337.01c adaptin Schizosaccharomyces pombe   chr 2                                                         |
| SPAC513.01c   | 5 | 10.5% | eft201 eft2-1, etf2, SPAPYUK71.04c  translation elongation factor 2 (PMID 9099890) Schizosaccharomyces pombe   chr1 |
| SPCP31B10.07  | 5 | 10.5% | eft202   translation elongation factor 2 (PMID 9099890) Schizosaccharomyces pombe  chr 3                            |
| SPAC16E8.10c  | 2 | 10.4% | mitochondrial ribosomal protein S7  Schizosaccharomyces pombe  chr1                                                 |
| SPBC18H10.03  | 2 | 10.3% | tif35   translation initiation factor  Schizosaccharomyces pombe  chr2                                              |
| SPBC3E7.15c   | 2 | 10.2% | SPBC4F6.02c LAG1 domain  Schizosaccharomyces pombe  chr2                                                            |
| SPAC26A3.16   | 2 | 10.2% | dph1   ubiquitin family protein  Schizosaccharomyces pombe  chr1                                                    |
| SPBC14F5.02   | 2 | 10.1% | sequence orphan  Schizosaccharomyces pombe  chr2                                                                    |
| SPBC31A8.01c  | 2 | 10.1% | cwl1 rttn1, SPBC651.13c reticulon-like protein Schizosaccharomyces pombe   chr 2                                    |
| SPCC569.06    | 2 | 10.0% | similar to S. pombe SPCC61.05 and SPAC26H5.07C Schizosaccharomyces pombe  chr 3                                     |
| SPAC12G12.07c | 2 | 10.0% | hypothetical protein  Schizosaccharomyces pombe  chr1                                                               |
| SPBP35G2.07   | 5 | 9.9%  | ilv1   acetolactate synthase subunit (PMID 8299177) Schizosaccharomyces pombe  chr 2                                |
| SPBC17G9.09   | 3 | 9.9%  | tif213   translation initiation factor 2 (gamma subunit) Schizosaccharomyces pombe  chr 2                           |
| SPCC1795.03   | 2 | 9.9%  | gms1   UDP-galactose transporter  Schizosaccharomyces pombe  chr3                                                   |
| SPBC17A3.04c  | 5 | 9.8%  | methionine-tRNA ligase (predicted)  Schizosaccharomyces pombe  chr2                                                 |
| SPAC1834.11c  | 5 | 9.8%  | sec18   AAA family ATPase  Schizosaccharomyces pombe  chr1                                                          |
| SPBC11B10.01  | 3 | 9.8%  | SPBC32H8.14 glycosyl transferase family 1 Schizosaccharomyces pombe   chr 2                                         |
| SPBC13E7.08c  | 2 | 9.8%  | proteasome interacting protein (predicted) Schizosaccharomyces pombe  chr 2                                         |
| SPCPB16A4.05c | 2 | 9.8%  | urease accessory protein UREG (ISS) Schizosaccharomyces pombe  chr3                                                 |
| SPBC12D12.03  | 4 | 9.7%  | cct1   chaperonin-containing T-complex  Schizosaccharomyces pombe  chr2                                             |
| SPAC3H8.02    | 2 | 9.7%  | sec14 cytosolic factor family  Schizosaccharomyces pombe  chr1                                                      |
| SPAC20H4.06c  | 2 | 9.6%  | hypothetical protein  Schizosaccharomyces pombe  chr1                                                               |
| SPCC1840.03   | 7 | 9.5%  | sal3 pse1 karyopherin Schizosaccharomyces pombe  chr 3                                                              |
| SPBC215.03c   | 2 | 9.5%  | csn1   COP9/signalosome complex (subunit 1) Schizosaccharomyces pombe   chr 2                                       |



|               |   |      |                                                                                                            |
|---------------|---|------|------------------------------------------------------------------------------------------------------------|
| SPCC757.09c   | 2 | 9.5% | rnc1   RNA-binding protein  Schizosaccharomyces pombe  chr3                                                |
| SPBC19C2.07   | 2 | 9.5% | fba1   fructose-bisphosphate aldolase (PMID 8286404)  Schizosaccharomyces pombe  chr 2                     |
| SPBC1289.06c  | 3 | 9.4% | sequence orphan  Schizosaccharomyces pombe  chr2                                                           |
| SPBC56F2.12   | 3 | 9.4% | acetoxyacid reductoisomerase (predicted)  Schizosaccharomyces pombe  chr 2                                 |
| SPBP4H10.11c  | 3 | 9.3% | long-chain-fatty-acid-CoA ligase activity (predicted)  Schizosaccharomyces pombe  chr 2                    |
| SPAC21E11.08  | 3 | 9.3% | lcb2  SPAC2C4.02  serine palmitoyltransferase (PMID 8921873) (predicted)  Schizosaccharomyces pombe  chr 1 |
| SPBC17G9.05   | 2 | 9.3% | cyp6   cyclophilin  Schizosaccharomyces pombe  chr 2                                                       |
| SPBC19G7.16   | 3 | 9.3% | transcription elongation factor complex (predicted)  Schizosaccharomyces pombe  chr2                       |
| SPCC16A11.16c | 2 | 9.3% | glycoprotein (predicted)  Schizosaccharomyces pombe  chr3                                                  |
| SPAC1851.02   | 2 | 9.3% | fatty acyltransferase  Schizosaccharomyces pombe  chr1                                                     |
| SPBC800.09    | 2 | 9.2% | sum2   involved in G2/M transition checkpoint (required) (PMID 9832516)  Schizosaccharomyces pombe  chr2   |
| SPBC25B2.03   | 2 | 9.0% | zinc finger protein  Schizosaccharomyces pombe  chr2                                                       |
| SPBC18E5.02c  | 3 | 9.0% | SPBC29A3.20c  serine palmitoyltransferase (subunit) (predicted)  Schizosaccharomyces pombe  chr 2          |
| SPBC354.02c   | 3 | 9.0% | sec61   translocon (alpha subunit) (predicted) (PMID 9427389)  Schizosaccharomyces pombe  chr2             |
| SPBC32H8.03   | 2 | 9.0% | bem46   suppressor of bem1  Schizosaccharomyces pombe  chr2                                                |
| SPAC1F7.05    | 3 | 8.9% | cdc22   ribonucleoside reductase  Schizosaccharomyces pombe  chr1                                          |
| SPCC417.08    | 5 | 8.7% | tef3  EF-3  translation elongation factor activity (TAS) (PMID 9099890)  Schizosaccharomyces pombe  chr3   |
| SPAC3C7.08c   | 6 | 8.5% | elf1   AAA family ATPase  Schizosaccharomyces pombe  chr1                                                  |
| SPBC17D11.05  | 4 | 8.5% | tif32   translation initiation factor  Schizosaccharomyces pombe  chr2                                     |
| SPBC16D10.07c | 2 | 8.5% | sir2   transcriptional regulator  Schizosaccharomyces pombe  chr2                                          |
| SPBC29B5.04c  | 3 | 8.4% | conserved fungal protein  Schizosaccharomyces pombe  chr2                                                  |
| SPCC1840.08c  | 3 | 8.4% | protein disulfide isomerase oxidoreductase family  Schizosaccharomyces pombe  chr3                         |
| SPBC646.11    | 4 | 8.4% | cct6   chaperonin-containing T-complex  Schizosaccharomyces pombe  chr2                                    |
| SPAC17H9.05   | 2 | 8.4% | ebp2   P40-like  Schizosaccharomyces pombe  chr 1                                                          |
| SPAC922.07c   | 2 | 8.3% | aldehyde dehydrogenase (predicted)  Schizosaccharomyces pombe  chr1                                        |
| SPAC926.04c   | 4 | 8.2% | swo1  hsp90  chaperone activity                                                                            |

|              |   |      |                                                                                                      |
|--------------|---|------|------------------------------------------------------------------------------------------------------|
|              |   |      | Schizosaccharomyces pombe   chr1                                                                     |
| SPAC3H1.10   | 2 | 8.2% | phytochelatin synthetase (PMID 10368185) (PMID 10369673)  Schizosaccharomyces pombe  chr1            |
| SPBC4C3.09   | 2 | 8.2% | galactosyltransferase family 8  Schizosaccharomyces pombe  chr2                                      |
| SPAC926.08c  | 2 | 8.2% | RNA-binding protein  Schizosaccharomyces pombe  chr1                                                 |
| SPCC1902.01  | 3 | 8.1% | gaf1 SPCC417.01c transcription factor (PMID 9714831) Schizosaccharomyces pombe  chr 3                |
| SPBC16A3.12c | 2 | 8.1% | triglyceride lipase-cholesterol esterase (predicted) Schizosaccharomyces pombe  chr 2                |
| SPBC887.10   | 2 | 8.0% | mcs4   mitotic catastrophe suppressor  Schizosaccharomyces pombe  chr2                               |
| SPAC6G9.03c  | 2 | 8.0% | hypothetical protein  Schizosaccharomyces pombe  chr1                                                |
| SPAP8A3.13c  | 2 | 7.9% | hypothetical protein  Schizosaccharomyces pombe  chr1     Manual                                     |
| SPBC23G7.12c | 2 | 7.9% | rpt6 let1 19S proteasome regulatory subunit Schizosaccharomyces pombe  chr 2                         |
| SPBC19C7.06  | 3 | 7.8% | proline-tRNA ligase (predicted)  Schizosaccharomyces pombe  chr2                                     |
| SPAC3F10.03  | 3 | 7.8% | glycine tRNA-ligase  Schizosaccharomyces pombe  chr1                                                 |
| SPBC646.05c  | 2 | 7.8% | erg9   squalene synthase (PMID 8474436) Schizosaccharomyces pombe  chr 2                             |
| SPBC3B8.03   | 2 | 7.8% | saccharopine dehydrogenase [NADP+, l-glutamate forming] (predicted)  Schizosaccharomyces pombe  chr2 |
| SPAC23G3.11  | 2 | 7.8% | rpn6   19S proteasome regulatory subunit Schizosaccharomyces pombe  chr 1                            |
| SPAC26A3.17c | 2 | 7.8% | SPAC8E11.11 N-methyltransferase (predicted) Schizosaccharomyces pombe  chr 1                         |
| SPAPB1E7.09  | 3 | 7.7% |                                                                                                      |
| SPBC16A3.15c | 2 | 7.7% | nda2   tubulin (alpha 1)  Schizosaccharomyces pombe  chr2                                            |
| SPAC1006.07  | 2 | 7.7% | translation initiation factor  Schizosaccharomyces pombe  chr1                                       |
| SPBC646.09c  | 2 | 7.6% | yin6 int6 translation initiation factor  Schizosaccharomyces pombe  chr2                             |
| SPCC1795.11  | 2 | 7.5% | sum3 ded1, slh3, moc2 DEAD/DEAH box helicase Schizosaccharomyces pombe  chr 3                        |
| SPAC1786.03  | 3 | 7.5% | cut11 SPAC24C9.01 localization nuclear membrane Schizosaccharomyces pombe  chr 1                     |
| SPAC23A1.12c | 3 | 7.5% | phenylalanine-tRNA ligase (beta subunit) (predicted)  Schizosaccharomyces pombe  chr1                |
| SPAC3A11.12c | 2 | 7.5% | rpt5 pam2, tpb1 19S proteasome regulatory subunit Schizosaccharomyces pombe  chr 1                   |
| SPAC186.02c  | 2 | 7.5% | 2-hydroxyacid dehydrogenase (predicted) Schizosaccharomyces pombe  chr 1                             |
| SPBC19G7.13  | 2 | 7.4% | Myb family Schizosaccharomyces pombe  chr 2                                                          |
| SPCC1259.09c | 2 | 7.2% | pyruvate dehydrogenase protein x component (predicted)  Schizosaccharomyces pombe  chr3              |

|               |    |      |                                                                                                  |
|---------------|----|------|--------------------------------------------------------------------------------------------------|
| SPAC139.02c   | 2  | 7.2% | MC oxaloacetate transporter (putative)  Schizosaccharomyces pombe chr 1                          |
| SPAC18G6.05c  | 13 | 7.1% | HEAT repeat  Schizosaccharomyces pombe chr 1                                                     |
| SPBC30B4.05   | 4  | 7.1% | karyopherin (predicted)  Schizosaccharomyces pombe chr2                                          |
| SPBC19F5.05c  | 3  | 7.1% | ppp1 SPBC25D12.01c localization nucleolus (predicted)  Schizosaccharomyces pombe chr2            |
| SPAC18B11.02c | 2  | 7.1% | DRAP deaminase activity (predicted)  Schizosaccharomyces pombe chr 1                             |
| SPCC1827.03c  | 2  | 7.0% | long-chain fatty acid transporter (predicted)  Schizosaccharomyces pombe chr 3                   |
| SPAC4D7.05    | 2  | 7.0% | sum1 tif34 translation initiation factor  Schizosaccharomyces pombe chr 1                        |
| SPAC9.09      | 3  | 6.9% | homocysteine methyltransferase  Schizosaccharomyces pombe ch1                                    |
| SPBC6B1.09c   | 2  | 6.9% | nbs1  FHA domain (phosphopeptide binding)  Schizosaccharomyces pombe chr 2                       |
| SPAC31A2.12   | 2  | 6.9% | arrestin family  Schizosaccharomyces pombe chr 1                                                 |
| SPAC4A8.06c   | 2  | 6.7% | esterase (predicted)  Schizosaccharomyces pombe chr 1                                            |
| SPAC1F8.07c   | 3  | 6.7% | pyruvate decarboxylase (predicted)  Schizosaccharomyces pombe chr 1                              |
| SPBC2G5.01    | 2  | 6.7% | hypothetical protein  Schizosaccharomyces pombe chr2                                             |
| SPAP8A3.09c   | 2  | 6.6% | paa1  protein phosphatase regulatory subunit  Schizosaccharomyces pombe chr 1                    |
| SPCC553.10    | 2  | 6.6% | serine-rich protein  Schizosaccharomyces pombe chr3                                              |
| SPAC9E9.12c   | 4  | 6.5% | transporter activity  Schizosaccharomyces pombe chr 1                                            |
| SPAC25G10.08  | 3  | 6.5% | translation initiation factor  Schizosaccharomyces pombe chr 1                                   |
| SPAC8E11.01c  | 2  | 6.5% | SPAC959.01 glycosyl hydrolase family 32  Schizosaccharomyces pombe chr 1                         |
| SPAC1420.03   | 2  | 6.5% | rpn501 rpn5-a 19S proteasome regulatory subunit (PMID 12783882)  Schizosaccharomyces pombe chr 1 |
| SPAPB8E5.02c  | 2  | 6.5% | rpn502 rpn5-b 19S proteasome regulatory subunit (PMID 12783882)  Schizosaccharomyces pombe chr 1 |
| SPBC25H2.02   | 3  | 6.4% | ths1  threonine-tRNA ligase (predicted)  Schizosaccharomyces pombe chr 2                         |
| SPBP19A11.07c | 2  | 6.4% | SPBP4H10.02c hypothetical protein  Schizosaccharomyces pombe chr 2                               |
| SPBC17F3.02   | 2  | 6.4% | nak1  N-terminal protein kinase  Schizosaccharomyces pombe chr2                                  |
| SPBC1773.01   | 2  | 6.4% | WD repeat protein  Schizosaccharomyces pombe chr2                                                |
| SPBC2D10.18   | 2  | 6.4% | abc1 coq8 ABC1 family  Schizosaccharomyces pombe chr2                                            |
| SPCC364.06    | 2  | 6.4% | involved in nucleosome assembly (predicted)  Schizosaccharomyces pombe chr 3                     |
| SPAC16.04     | 2  | 6.2% | zinc finger protein  Schizosaccharomyces pombe chr 1                                             |

|               |   |      |                                                                                             |
|---------------|---|------|---------------------------------------------------------------------------------------------|
| SPBC119.01    | 2 | 6.2% | rpn3 SPBPJ4664.07 19S proteasome regulatory subunit Schizosaccharomyces pombe chr 2         |
| SPBC646.10c   | 2 | 6.2% | ribonucleoprotein (RNP) complex (predicted) (PMID 12068309)  Schizosaccharomyces pombe chr2 |
| SPCC1682.16   | 2 | 6.2% | rpt4   19S proteasome regulatory subunit Schizosaccharomyces pombe chr 3                    |
| SPBP4H10.15   | 4 | 6.1% | aconitate hydratase (predicted)  Schizosaccharomyces pombe chr2                             |
| SPAC7D4.11c   | 2 | 6.1% | hypothetical protein  Schizosaccharomyces pombe chr1                                        |
| SPCP1E11.11   | 3 | 6.1% | RNA-binding protein  Schizosaccharomyces pombe chr3                                         |
| SPCC962.03c   | 2 | 6.1% | cut15   karyopherin  Schizosaccharomyces pombe chr 3                                        |
| SPAC14C4.14   | 2 | 6.0% | atp1   F1-ATPase (alpha subunit) (PMID 1824697)  Schizosaccharomyces pombe chr 1            |
| SPAC56E4.04c  | 8 | 5.9% | cut6   acetyl-CoA carboxylase  Schizosaccharomyces pombe chr1                               |
| SPAC1D4.11c   | 3 | 5.9% | lkh1   kic1   dual specificity protein kinase  Schizosaccharomyces pombe chr 1              |
| SPAC12B10.16c | 2 | 5.9% | hypothetical protein  Schizosaccharomyces pombe chr1                                        |
| SPAC3H1.05    | 2 | 5.9% | CAAX prenyl protease (predicted)  Schizosaccharomyces pombe chr1                            |
| SPBC646.14c   | 2 | 5.9% | orc5   origin recognition complex (subunit 5)  Schizosaccharomyces pombe chr 2              |
| SPAC1F12.07   | 2 | 5.9% | phosphoserine aminotransferase (predicted)  Schizosaccharomyces pombe chr 1                 |
| SPCC4G3.18    | 3 | 5.8% | hypothetical protein  Schizosaccharomyces pombe chr3                                        |
| SPCC895.07    | 2 | 5.8% | alp14   localization spindle pole body  Schizosaccharomyces pombe chr3                      |
| SPAC9E9.03    | 3 | 5.8% | leu2   3-isopropylmalate dehydratase (predicted)  Schizosaccharomyces pombe chr 1           |
| SPBP8B7.19    | 5 | 5.7% | FACT complex component  Schizosaccharomyces pombe chr2                                      |
| SPCC1259.02c  | 3 | 5.7% | 6 predicted transmembrane helices  Schizosaccharomyces pombe chr3                           |
| SPBC428.01c   | 2 | 5.7% | nup107 SPBC582.11c nucleoporin (PMID 11309419)  Schizosaccharomyces pombe chr 2             |
| SPAC167.05    | 2 | 5.7% | SPAC57A7.01 Usp (universal stress protein) domain  Schizosaccharomyces pombe chr 1          |
| SPAC1420.01c  | 2 | 5.7% | SPAC56E4.08c hypothetical protein  Schizosaccharomyces pombe chr1                           |
| SPAC56F8.03   | 3 | 5.6% | translation initiation factor if-2 (predicted)  Schizosaccharomyces pombe chr 1             |
| SPBC21H7.04   | 2 | 5.6% | DEAD/DEAH box helicase  Schizosaccharomyces pombe chr2                                      |
| SPBC21C3.15c  | 2 | 5.6% | aldehyde-dehydrogenase-like  Schizosaccharomyces pombe chr 2                                |
| SPBP19A11.06  | 3 | 5.5% | lid2 SPBP4H10.01 transcription factor  Schizosaccharomyces pombe chr2                       |
| SPBC4F6.17c   | 2 | 5.5% | AAA family ATPase  Schizosaccharomyces pombe chr2                                           |

|              |   |      |                                                                                               |
|--------------|---|------|-----------------------------------------------------------------------------------------------|
| SPBC651.01c  | 2 | 5.5% | SPBC725.18c GTPase activity (predicted) Schizosaccharomyces pombe chr 2                       |
| SPAC22F8.08  | 2 | 5.4% | COPII-coated vesicle component (predicted) Schizosaccharomyces pombe chr 1                    |
| SPAC29A4.02c | 2 | 5.4% | translation elongation factor 1 (gamma subunit) (PMID 9099890) Schizosaccharomyces pombe chr1 |
| SPAC26A3.05  | 6 | 5.3% | chc1  clathrin heavy chain (predicted) Schizosaccharomyces pombe chr1                         |
| SPBC83.16c   | 3 | 5.3% | conserved protein Schizosaccharomyces pombe chr2                                              |
| SPAC1D4.12   | 2 | 5.2% | rad15 rhp3 transcription factor TFIIH complex Schizosaccharomyces pombe chr 1                 |
| SPBC21.01    | 2 | 5.2% | SPBC776.19 hypothetical protein Schizosaccharomyces pombe chr2                                |
| SPBPJ4664.06 | 4 | 5.1% | gpt1  glycosyl transferase family 8 Schizosaccharomyces pombe chr2                            |
| SPBC17G9.11c | 3 | 5.1% | pyr1  pyruvate carboxylase Schizosaccharomyces pombe chr2                                     |
| SPBC29A3.14c | 2 | 5.1% | trt1  telomerase catalytic subunit (PMID 9774280) Schizosaccharomyces pombe chr 2             |
| SPBC660.08   | 2 | 5.1% | sequence orphan Schizosaccharomyces pombe chr2                                                |
| SPAC1805.17  | 3 | 5.0% | crm1 caf2, SPAC1B2.01 chromosome region maintenance protein 1 Schizosaccharomyces pombe chr1  |
| SPBC3D6.13c  | 2 | 5.0% | protein disulfide isomerase oxidoreductase family Schizosaccharomyces pombe chr2              |
| SPBC1A4.09   | 2 | 5.0% | conserved protein Schizosaccharomyces pombe chr2                                              |
| SPAC22H10.07 | 2 | 5.0% | scd2 ral3 involved in conjugation (regulation) Schizosaccharomyces pombe chr 1                |
| SPBC1105.01  | 3 | 4.9% | SPBPB7E8.03 HEAT repeat (ISS) (PMID 14729571) Schizosaccharomyces pombe chr 2                 |
| SPBC17D1.07c | 2 | 4.9% | calcium binding protein Schizosaccharomyces pombe chr2                                        |
| SPCP1E11.06  | 2 | 4.9% | apl4  adaptin (predicted) Schizosaccharomyces pombe chr3                                      |
| SPCC757.04   | 2 | 4.8% | transcriptional regulator (predicted) Schizosaccharomyces pombe chr3                          |
| SPCC1494.03  | 2 | 4.7% | hypothetical protein Schizosaccharomyces pombe chr3                                           |
| SPAC328.01c  | 2 | 4.6% | SPAC3A11.01 importin-beta family Schizosaccharomyces pombe chr1                               |
| SPAC1B3.13   | 2 | 4.6% | WD repeat protein Schizosaccharomyces pombe chr1                                              |
| SPAPB8E5.07c | 3 | 4.5% | HEAT repeat Schizosaccharomyces pombe chr 1                                                   |
| SPCC4G3.12c  | 2 | 4.5% | zinc finger protein Schizosaccharomyces pombe chr3                                            |
| SPCC1020.01c | 3 | 4.4% | pma2 SPCC1393.01 P-type proton ATPase (PMID 12707717) Schizosaccharomyces pombe chr3          |
| SPAC24H6.01c | 2 | 4.4% | SPAPB21F2.01 O-acyl transferase (predicted) Schizosaccharomyces pombe chr 1                   |
| SPAC23A1.07  | 1 | 4.4% | zinc finger protein Schizosaccharomyces pombe chr1                                            |

|               |   |      |                                                                                                                |
|---------------|---|------|----------------------------------------------------------------------------------------------------------------|
| SPAC9G1.10c   | 2 | 4.3% | inositol polyphosphate phosphatase (predicted) Schizosaccharomyces pombe chr 1                                 |
| SPAPB2C8.01   | 4 | 4.3% | glycoprotein (predicted) Schizosaccharomyces pombe chr1                                                        |
| SPBC3B8.11    | 2 | 4.3% | hypothetical protein Schizosaccharomyces pombe chr2                                                            |
| SPBC19C7.11   | 2 | 4.3% | ClC chloride channel (predicted) Schizosaccharomyces pombe chr2                                                |
| SPBP8B7.20c   | 2 | 4.3% | methyltransferase (predicted) Schizosaccharomyces pombe chr2                                                   |
| SPAC20G8.09c  | 2 | 4.2% | conserved protein Schizosaccharomyces pombe chr1                                                               |
| SPCC31H12.07  | 2 | 4.2% | sec231 sec23a, SPCC5E4.01 GTPase activating protein (ISS) Schizosaccharomyces pombe chr3                       |
| SPBC4F6.13c   | 2 | 4.2% | WD repeat protein Schizosaccharomyces pombe chr2                                                               |
| SPBC337.08c   | 1 | 4.2% | ubi4 ubiquitin family protein Schizosaccharomyces pombe chr2                                                   |
| SPAC6F6.06c   | 3 | 4.1% | involved in cell polarity (predicted) Schizosaccharomyces pombe chr1                                           |
| SPCC550.11    | 2 | 4.1% | RanBP7/importin-beta/Cse1p family Schizosaccharomyces pombe chr3                                               |
| SPBC20F10.05  | 2 | 4.1% | sequence orphan Schizosaccharomyces pombe chr2                                                                 |
| SPAC29B12.07  | 3 | 4.0% | sec16 involved in ER to Golgi transport Schizosaccharomyces pombe chr 1                                        |
| SPBC17G9.04c  | 2 | 4.0% | nup85 nuclear pore complex Schizosaccharomyces pombe chr2                                                      |
| SPBC691.05c   | 2 | 4.0% | pi030 SPBP22H7.01c ion channel (predicted) Schizosaccharomyces pombe chr 2                                     |
| SPBC13A2.04c  | 2 | 4.0% | ptr2 PTR family peptide transporter Schizosaccharomyces pombe chr2                                             |
| SPAC19A8.08   | 2 | 3.9% | upf2 involved in mRNA catabolism, nonsense-mediated (required) (PMID 11073994) Schizosaccharomyces pombe chr 1 |
| SPBC25H2.11c  | 2 | 3.9% | bromodomain protein Schizosaccharomyces pombe chr2                                                             |
| SPBC25H2.13c  | 3 | 3.8% | cdc20 pol2 DNA polymerase epsilon (catalytic subunit a) (PMID 9356477) Schizosaccharomyces pombe chr2          |
| SPBC1105.08   | 2 | 3.8% | EMP70 family Schizosaccharomyces pombe chr 2                                                                   |
| SPAC19B12.07c | 2 | 3.8% | zinc finger protein Schizosaccharomyces pombe chr1                                                             |
| SPCC962.01    | 3 | 3.7% | SPCP31B10.09 C2 domain Schizosaccharomyces pombe chr3                                                          |
| SPBC4.03c     | 2 | 3.7% | COPII-coated vesicle component (putative) Schizosaccharomyces pombe chr 2                                      |
| SPBC21D10.09c | 2 | 3.6% | zinc finger protein Schizosaccharomyces pombe chr2                                                             |
| SPAC2F3.06c   | 2 | 3.6% | kap104 karyopherin Schizosaccharomyces pombe chr 1                                                             |
| SPAC4F10.09c  | 2 | 3.6% | involved in ribosome biogenesis and assembly (predicted) Schizosaccharomyces pombe chr1                        |
| SPCC1223.07c  | 2 | 3.6% | aspartate-tRNA ligase (predicted) Schizosaccharomyces pombe chr3                                               |

|               |   |      |                                                                                                                                    |
|---------------|---|------|------------------------------------------------------------------------------------------------------------------------------------|
| SPAC17A5.14   | 2 | 3.5% | exo2   exonuclease II (PMID 8781170)  Schizosaccharomyces pombe  chr1                                                              |
| SPAC29E6.10c  | 2 | 3.5% | SPAC30.14c  conserved protein  Schizosaccharomyces pombe  chr1                                                                     |
| SPAC110.04c   | 2 | 3.5% | pss1 ssp1, SPAP14E8.01c heat shock protein 70 family Schizosaccharomyces pombe chr1                                                |
| SPCC63.04     | 3 | 3.4% | mok14   a-1,3-glucan synthase  Schizosaccharomyces pombe  chr3                                                                     |
| SPAC57A7.10c  | 2 | 3.4% | sec21   adaptin Schizosaccharomyces pombe chr1                                                                                     |
| SPBC20F10.07  | 2 | 3.4% | hypothetical protein  Schizosaccharomyces pombe chr2                                                                               |
| SPBC947.15c   | 2 | 3.3% | NADH dehydrogenase (predicted)  Schizosaccharomyces pombe chr2                                                                     |
| SPAC4F8.13c   | 3 | 3.2% | rng2   IQGAP Schizosaccharomyces pombe chr1                                                                                        |
| SPAC3G6.01    | 2 | 3.2% | hrp3   CHD family Schizosaccharomyces pombe chr1                                                                                   |
| SPAC1565.08   | 2 | 3.2% | cdc48 SPAC6F12.01 AAA family ATPase  Schizosaccharomyces pombe chr1                                                                |
| SPCC736.14    | 2 | 3.1% | dis1   microtubule-associated protein (PMID 7628693)  Schizosaccharomyces pombe chr3                                               |
| SPAC20G8.06   | 3 | 3.0% | CCR4-Not complex (predicted)  Schizosaccharomyces pombe chr1                                                                       |
| SPAC26F1.13c  | 2 | 3.0% | leucine-tRNA ligase (predicted)  Schizosaccharomyces pombe chr1                                                                    |
| SPAC1834.02   | 3 | 2.9% | aro1   pentafunctional aromatic polypeptide Schizosaccharomyces pombe chr1                                                         |
| SPCC18B5.01c  | 3 | 2.9% | bfr1   hba2, SPCPJ732.04c ABC transporter family Schizosaccharomyces pombe chr3                                                    |
| SPAPYUK71.03c | 2 | 2.9% | C2 domain  Schizosaccharomyces pombe chr1                                                                                          |
| SPAPB15E9.01c | 2 | 2.9% | SPAPB18E9.06c hypothetical protein  Schizosaccharomyces pombe chr1                                                                 |
| SPAC2F7.16c   | 3 | 2.8% | phospholipase D (predicted)  Schizosaccharomyces pombe chr1                                                                        |
| SPAC2G11.02   | 2 | 2.8% | hypothetical protein  Schizosaccharomyces pombe chr1                                                                               |
| SPBC36.07     | 2 | 2.7% | RNA polymerase II (elongator subunit) (predicted)  Schizosaccharomyces pombe chr2                                                  |
| SPAC13G6.01c  | 2 | 2.7% | rad8 SPAC5H10.14c zinc finger protein Schizosaccharomyces pombe chr1                                                               |
| SPCC417.07c   | 3 | 2.6% | mbo1   involved in microtubule cytoskeleton organization and biogenesis (pers. comm. Sally McFall)  Schizosaccharomyces pombe chr3 |
| SPBC11C11.04c | 2 | 2.6% | alp1   tubulin specific chaperone (cofactor D) Schizosaccharomyces pombe chr2                                                      |
| SPBC211.03c   | 2 | 2.5% | Sec7 domain Schizosaccharomyces pombe chr2                                                                                         |
| SPAC15A10.16  | 3 | 2.5% | fat1 SPAC15E1.01 actin-binding protein (predicted) Schizosaccharomyces pombe chr1                                                  |
| SPAC1071.02   | 2 | 2.4% | involved in DNA repair (predicted)  Schizosaccharomyces pombe chr1                                                                 |
| SPBC28F2.12   | 2 | 2.3% | rpb1   DNA-directed RNA polymerase (II subunit) (large subunit) (PMID 2011520)  Schizosaccharomyces pombe chr2                     |

|               |   |      |                                                                                                          |
|---------------|---|------|----------------------------------------------------------------------------------------------------------|
| SPAC688.10    | 2 | 2.3% | rev3   DNA polymerase zeta (catalytic subunit)  Schizosaccharomyces pombe  chr 1                         |
| SPAC23C4.19   | 2 | 2.3% | spt5   involved in transcriptional regulation  Schizosaccharomyces pombe  chr 1                          |
| SPBC16D10.08c | 2 | 2.3% | AAA family ATPase  Schizosaccharomyces pombe  chr2                                                       |
| SPCC1919.10c  | 2 | 2.2% | myo52   myosin (type V)  Schizosaccharomyces pombe  chr3                                                 |
| SPCC1672.11c  | 2 | 2.2% | P-type ATPase (predicted) (PMID 12707717)  Schizosaccharomyces pombe  chr 3                              |
| SPBC17D11.07c | 2 | 2.2% | rpn2   19S proteasome regulatory subunit  Schizosaccharomyces pombe  chr 2                               |
| SPAC1F8.03c   | 2 | 2.2% | str3   membrane transporter  Schizosaccharomyces pombe  chr1                                             |
| SPAC1F5.04c   | 2 | 2.1% | cdc12   formin  Schizosaccharomyces pombe  chr 1                                                         |
| SPAC6G9.10c   | 2 | 2.1% | sen1   DNA2/NAM7 family  Schizosaccharomyces pombe  chr1                                                 |
| SPAC1782.01   | 2 | 2.1% | SPAPYUG7.07  conserved eukaryotic protein  Schizosaccharomyces pombe  chr 1                              |
| SPCC1620.14c  | 2 | 2.1% | SPCC830.01c SNF2 family  Schizosaccharomyces pombe  chr 3                                                |
| SPCC290.03c   | 2 | 2.1% | nucleoporin  Schizosaccharomyces pombe  chr 3                                                            |
| SPAC31A2.05c  | 2 | 2.1% | mis4   adherin  Schizosaccharomyces pombe  chr 1                                                         |
| SPAC23D3.06c  | 2 | 2.1% | nucleoporin  Schizosaccharomyces pombe  chr 1                                                            |
| SPBC19C7.02   | 2 | 2.0% | ubr1 SPBC32F12.14 ubiquitin-protein ligase (E3)  Schizosaccharomyces pombe  chr 2                        |
| SPAP27G11.10c | 2 | 2.0% | nup184   nucleoporin  Schizosaccharomyces pombe  chr 1                                                   |
| SPBPJ4664.02  | 3 | 1.9% | hypothetical protein  Schizosaccharomyces pombe  chr 2                                                   |
| SPAC19B12.03  | 2 | 1.9% | bgs3   1,3-beta-glucan synthase (subunit) (PMID 12582133)  Schizosaccharomyces pombe  chr 1              |
| SPAPB24D3.09c | 2 | 1.9% | ABC transporter family  Schizosaccharomyces pombe  chr 1                                                 |
| SPAC1093.06c  | 5 | 1.8% | dhc1 SPAC30C2.01c dynein heavy chain (PMID 10855500)  Schizosaccharomyces pombe  chr 1                   |
| SPAPB1E7.07   | 2 | 1.8% | glutamate synthase (predicted)  Schizosaccharomyces pombe  chr 1                                         |
| SPBC216.05    | 2 | 1.6% | rad3   ATR (ATM) checkpoint kinase  Schizosaccharomyces pombe  chr 2                                     |
| SPAC3G9.14    | 1 | 1.6% | sak1   RFX domain  Schizosaccharomyces pombe  chr 1                                                      |
| SPCC1281.01   | 2 | 1.5% | ags1  mok1, SPCC17A7.01, SPCC338.01c a-1,3-glucan synthase  Schizosaccharomyces pombe  chr 3             |
| SPBC16C6.02c  | 3 | 1.4% | vps1302 vps13b involved in intracellular protein transport (predicted)  Schizosaccharomyces pombe  chr 2 |
| SPCC23B6.03c  | 3 | 1.4% | tel1   phosphatidylinositol kinase  Schizosaccharomyces pombe  chr 3                                     |
| SPAC23G3.02c  | 4 | 1.2% | peptide synthetase (predicted)  Schizosaccharomyces pombe  chr 1                                         |



|               |   |      |                                                                                                          |
|---------------|---|------|----------------------------------------------------------------------------------------------------------|
| SPBP19A11.04c | 2 | 1.1% | mor2 cps12 involved in cellular morphogenesis (required) (PMID 12234926) Schizosaccharomyces pombe chr 2 |
| SPCC737.08    | 2 | 0.7% | midasin (predicted) Schizosaccharomyces pombe chr 3                                                      |
